# Supplementary material for: Silver-catalyzed furoquinolines synthesis: from nitrogen effects to the use of silver imidazolatepolymer as a new and robust silver catalyst
Source: Royal Society of Chemistry journal article supplement (doi:10.1039/c0cc02623a), 2010-08-23

## SUPPORTING INFORMATION

### **Silver-catalyzed furoquinolines synthesis: From nitrogen effects to the use of silver imidazolate polymer as a new and robust silver catalyst**

**Evelyne Parker,<sup>a</sup> Nicolas Leconte,<sup>b</sup> Thomas Godet,<sup>a</sup> and Philippe Belmont\*<sup>a,b</sup>**

<sup>a</sup> *University of Lyon and CNRS, UMR 5246 ICBMS,  
Laboratoire de Synthèse et Méthodologie Organiques,  
43 Boulevard du 11 Novembre 1918, 69622 Villeurbanne (Lyon), France.*

<sup>b</sup> *Institut Curie and CNRS, UMR 176 CSVB,  
Team “Organometallic Chemistry, Heterocycles and Biological targets”,  
Institut Curie, 26 rue d'Ulm, 75248 Paris cedex 05, France.  
Fax : +33 (0)1.56.24.66.31, Tel : +33 (0)1.56.24.68.24, E-mail: Philippe.Belmont@curie.fr,  
url: [http://www.curie.fr/equipe/388/lang/\\_gb](http://www.curie.fr/equipe/388/lang/_gb)*

## General methods:

### General procedure for the AgOTf-catalyzed cyclization/acetalization tandem reaction.

Silver triflate (5 mol%) was added in one portion to a solution of 2-alkynyl-3-carbaldehyde quinoline (0.1 mmol) in *N,N*-diethylaminoethanol (2 mL, 0.05M) under argon. The mixture was stirred at r.t. until completion of the reaction (TLC monitoring) and filtered through celite. The celite pad was abundantly washed with dichloromethane (20 mL) and the filtrate was washed with sat. aq. solution of NaHCO<sub>3</sub> (×3) and brine. The organic layer was then dried over Na<sub>2</sub>SO<sub>4</sub>, filtered and concentrated under reduced pressure. Flash chromatography on silica gel (*c*-Hexane / EtOAc (1%Et<sub>3</sub>N); 9 : 1 to 0 : 1) afforded the desired furoquinoline.

### General procedure for the Ag<sub>2</sub>O-catalyzed cyclization/acetalization tandem reaction.

Silver(I) oxide (5 mol%) was added in one portion to a solution of 2-alkynyl-3-carbaldehyde quinoline (0.1 mmol) in *N,N*-diethylaminoethanol (2 mL, 0.05M) under argon. The mixture was stirred at r.t. until completion of the reaction (TLC monitoring) and filtered through celite. The celite pad was abundantly washed with dichloromethane (20 mL) and the filtrate was washed with a saturated aqueous solution of NaHCO<sub>3</sub> (×3) and brine to afford the desired compound.

**Representative procedure for the [Ag(I<sub>m</sub>)]<sub>n</sub>-catalyzed cyclization/acetalization tandem reaction, compound (12).** A *N,N*-diethylaminoethanol solution (1 mL) containing [Ag(I<sub>m</sub>)]<sub>n</sub> (1.7 mg, 9.7 μmol, 5 mol%) and PPh<sub>3</sub> (2.6 mg, 9.7 μmol, 5 mol%) is vigorously stirred during 30 min at r.t. and the 2-phenylalkynyl-3-carbaldehyde quinoline<sup>1</sup> (47.0 mg, 0.2 mmol) is added in one portion. After 30 min (TLC monitoring) the reaction mixture was filtered through celite and the filtrate was concentrated under reduced pressure. Flash chromatography on basic alumina (*c*-Hexane / EtOAc ; 8 : 2 to 0 : 1) afforded the desired furoquinoline **12** (68 mg, 100%) as a yellow oil.

---

<sup>1</sup> The detailed experimental procedure for the quinolines starting materials and compounds **1-6** can be found in :  
- A. Patin, P. Belmont *Synthesis* 2005, (14), 2400-2406.  
- T. Godet, C. Vaxelaire, C. Michel, A. Milet and P. Belmont, *Chem.--Eur. J.*, 2007, 13, 5632- 5641.

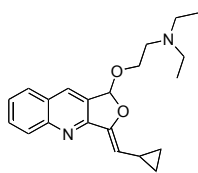

**(7)** Yellow oil.  $\delta_{\text{H}}$  (300 MHz;  $\text{CDCl}_3$ ) 0.59-0.64 (2H, m,  $\text{CH}_2(\text{cyclopropyl})$ ), 0.88-0.95 (2H, m,  $\text{CH}_2(\text{cyclopropyl})$ ), 1.04 (6H, t,  $J$  7.2,  $\text{N}(\text{CH}_2\text{-CH}_3)_2$ ), 1.89-2.01 (1H, m,  $\text{CH}(\text{cyclopropyl})$ ), 2.61 (4H, q,  $J$  7.2,  $\text{N}(\text{CH}_2\text{-CH}_3)_2$ ), 2.79 (2H, t,  $J$  6.3,  $\text{O-CH}_2\text{-CH}_2\text{-N}$ ), 3.79-3.93 (2H, m,  $\text{O-CH}_2\text{-CH}_2\text{-N}$ ), 5.33 (1H, d,  $J$  10.2,  $\text{C=CH-CH}$ ), 6.62 (1H, s,  $\text{CH-O}$ ), 7.50 (1H, ddd,  $J$  1.2 and 6.9 and 8.1,  $\text{H}_{\text{Ar}}$ ), 7.71 (1H, ddd,  $J$  1.5 and 6.9 and 8.4,  $\text{H}_{\text{Ar}}$ ), 7.82 (1H, dd,  $J$  1.2 and 8.1,  $\text{H}_{\text{Ar}}$ ), 8.06 (1H, d,  $J$  8.4,  $\text{H}_{\text{Ar}}$ ) and 8.16 (1H, s,  $\text{H}_{\text{Ar}}$ );  $\delta_{\text{C}}$  (75 MHz;  $\text{CDCl}_3$ ) 7.8, 8.0, 8.8, 11.8, 47.7, 52.4, 66.1, 103.4, 107.4, 126.4, 127.6, 128.6, 129.0, 129.3, 130.5, 131.6, 149.9, 150.4 and 153.9;  $\nu_{\text{max}}/\text{cm}^{-1}$  2966 and 2926 (C-H), 1623 (C=C), 1308 (C=N), 1065 (C-O) and 1027 (C-N); HRMS (ESI+):  $m/z$  calcd for  $[\text{C}_{21}\text{H}_{27}\text{N}_2\text{O}_2]^+$ : 339.2067; found: 339.2068

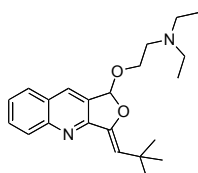

**(8)** Yellow oil.  $\delta_{\text{H}}$  (300 MHz;  $\text{CDCl}_3$ ) 1.05 (6H, t,  $J$  7.2,  $\text{N}(\text{CH}_2\text{-CH}_3)_2$ ), 1.31 (9H, s,  $\text{C}(\text{CH}_3)_3$ ), 2.62 (4H, q,  $J$  7.2,  $\text{N}(\text{CH}_2\text{-CH}_3)_2$ ), 2.79 (2H, t,  $J$  7.3,  $\text{O-CH}_2\text{-CH}_2\text{-N}$ ), 3.84 (2H, t,  $J$  6.3,  $\text{O-CH}_2\text{-CH}_2\text{-N}$ ), 5.83 (1H, s,  $\text{CH-}t\text{-Bu}$ ), 6.59 (1H, s,  $\text{CH-O}$ ), 7.51 (1H, ddd,  $J$  1.2 and 6.9 and 8.1,  $\text{H}_{\text{Ar}}$ ), 7.72 (1H, ddd,  $J$  1.2 and 6.9 and 8.4,  $\text{H}_{\text{Ar}}$ ), 7.83 (1H, d,  $J$  8.1,  $\text{H}_{\text{Ar}}$ ), 8.10 (1H, d,  $J$  8.7,  $\text{H}_{\text{Ar}}$ ) and 8.17 (1H, s,  $\text{H}_{\text{Ar}}$ );  $\delta_{\text{C}}$  (75 MHz,  $\text{CDCl}_3$ ) 11.8, 30.5, 31.9, 47.7, 52.4, 65.8, 103.5, 112.0, 126.5, 127.7, 128.6, 129.4, 130.5, 131.5, 148.8, 149.9 and 155.1;  $\nu_{\text{max}}/\text{cm}^{-1}$  2960 (C-H), 1625 and 1504 (C=C), 1069 (C-O) and 1023 (C-N); HRMS (ESI+):  $m/z$  calcd for  $[\text{C}_{22}\text{H}_{31}\text{N}_2\text{O}_2]^+$ : 355.2380 found: 355.2382

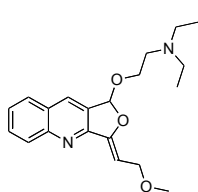

**(9)** Yellow oil.  $\delta_{\text{H}}$  (300 MHz;  $\text{CDCl}_3$ ) 1.02 (6H, t,  $J$  7.1,  $\text{N}(\text{CH}_2\text{-CH}_3)_2$ ), 2.58 (4H, q,  $J$  7.1,  $\text{N}(\text{CH}_2\text{-CH}_3)_2$ ), 2.74 (2H, t,  $J$  6.3,  $\text{O-CH}_2\text{-CH}_2\text{-N}$ ), 3.41 (3H, s,  $\text{OCH}_3$ ), 3.76-3.80 (2H, m,  $\text{O-CH}_2\text{-CH}_2\text{-N}$ ), 4.27-4.41 (2H, m,  $\text{CH}_2\text{-OCH}_3$ ), 5.93 (1H, t,  $J$  7.3,  $\text{CH-CH}_2\text{-OCH}_3$ ), 6.60 (1H, s,  $\text{CH-O}$ ), 7.54 (1H, ddd,  $J$  1.0 and 7.0 and 8.2,  $\text{H}_{\text{Ar}}$ ), 7.75 (1H, ddd,  $J$  1.5 and 7.0 and 8.5,  $\text{H}_{\text{Ar}}$ ), 7.85 (1H, d,  $J$  8.2,  $\text{H}_{\text{Ar}}$ ), 8.13 (1H, d,  $J$  8.5,  $\text{H}_{\text{Ar}}$ ) and 8.19 (1H, s,  $\text{H}_{\text{Ar}}$ );  $\delta_{\text{C}}$  (75 MHz,  $\text{CDCl}_3$ ) 11.6, 47.7, 52.3, 57.9, 62.3, 66.3, 97.4, 104.1, 127.0, 127.9, 128.6, 129.3, 129.7, 130.7, 131.6, 150.0, 153.0 and 153.5;  $\nu_{\text{max}}/\text{cm}^{-1}$  2968, 2926, 2874 and 2817 (C-H), 1624 and 1505 (C=C), 1115 and 1074 (C-O and C-N); HRMS (CI):  $m/z$  calcd for  $[\text{C}_{20}\text{H}_{27}\text{N}_2\text{O}_3]^+$ : 343.2022; found: 343.2022

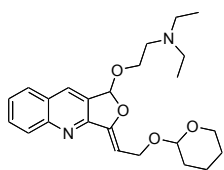

**(10)** Orange oil.  $\delta_{\text{H}}$  (300 MHz;  $\text{CDCl}_3$ ) 1.05 (6H, t,  $J$  7.2,  $\text{N}(\text{CH}_2\text{-CH}_3)_2$ ), 1.50-1.88 (6H, m, 3 x  $\text{CH}_{2(\text{THP})}$ ), 2.62 (4H, q,  $J$  7.2,  $\text{N}(\text{CH}_2\text{-CH}_3)_2$ ), 2.78 (2H, br s,  $\text{O-CH}_2\text{-CH}_2\text{-N}$ ), 3.52-3.58 (1H, m,  $H_{5b(\text{THP})}$ ), 3.85-3.99 (3H, m,  $H_{5a(\text{THP})}$  and  $\text{O-CH}_2\text{-CH}_2\text{-N}$ ), 4.43-4.62 (2H, m,  $=\text{CH-CH}_2\text{-O}$ ), 4.79 (1H, dd,  $J$  3.0 and 6.3,  $H_{1(\text{THP})}$ ), 5.96 (1H, t,  $J$  7.5,  $=\text{CH-CH}_2\text{O}$ ), 6.60 (1H, s,  $\text{CH-O}$ ), 7.54 (1H, ddd,  $J$  1.5 and 6.9 and 8.1,  $H_{\text{Ar}}$ ), 7.74 (1H, ddd,  $J$  1.2 and 6.9 and 8.4,  $H_{\text{Ar}}$ ), 7.85 (1H, d,  $J$  8.1,  $H_{\text{Ar}}$ ), 8.12 (1H, d,  $J$  8.4,  $H_{\text{Ar}}$ ) and 8.20 (1H, s,  $H_{\text{Ar}}$ );  $\delta_{\text{C}}$  (75 MHz;  $\text{CDCl}_3$ ) 11.6, 19.5, 25.7, 30.8, 47.7, 52.3, 61.1, 62.2, 66.3, 97.8, 104.1, 127.0, 127.9, 128.6, 129.4, 129.7, 130.6, 131.6, 150.0, 152.6 and 153.6;  $\nu_{\text{max}}/\text{cm}^{-1}$  2937 and 2871 (C-H), 1623 and 1505 (C=C), 1312 (C=N), 1114 and 1075 (C-O) and 1021 (C-N); HRMS (ESI+):  $m/z$  calcd for  $[\text{C}_{24}\text{H}_{33}\text{N}_2\text{O}_4]^+$ : 413.2435; found: 413.2445

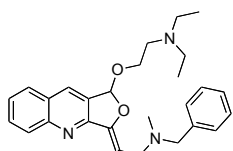

**(11)** Yellow oil.  $\delta_{\text{H}}$  (400 MHz;  $\text{CDCl}_3$ ) 1.02 (6H, t,  $J$  7.2,  $\text{N}(\text{CH}_2\text{-CH}_3)_2$ ), 2.31 (3H, s,  $\text{NCH}_3$ ), 2.57 (4H, q,  $J$  7.2,  $\text{N}(\text{CH}_2\text{-CH}_3)_2$ ), 2.74 (2H, t,  $J$  6.3,  $\text{O-CH}_2\text{-CH}_2\text{-N}$ ), 3.48 (2H, dd,  $J$  2.8 and 7.4,  $=\text{CH-CH}_2\text{N}$ ), 3.61 (1H, d,  $J$  13.2,  $\text{NCH}_a\text{H}_b\text{Ph}$ ), 3.66 (1H, d,  $J$  13.2,  $\text{NCH}_a\text{H}_b\text{Ph}$ ), 3.75-3.86 (2H, m,  $\text{O-CH}_2\text{-CH}_2\text{-N}$ ), 5.99 (1H, t,  $J$  7.4,  $=\text{CH-CH}_2\text{N}$ ), 6.59 (1H, s,  $\text{CH-O}$ ), 7.24 (1H, d,  $J$  7.1,  $H_{\text{Ar}}$ ), 7.31 (2H, dd,  $J$  7.1 and 7.2,  $H_{\text{Ar}}$ ), 7.38 (2H, d,  $J$  7.2,  $H_{\text{Ar}}$ ), 7.53 (1H, ddd,  $J$  1.1 and 6.9 and 8.1,  $H_{\text{Ar}}$ ), 7.74 (1H, ddd,  $J$  1.4 and 6.9 and 8.6,  $H_{\text{Ar}}$ ), 7.84 (1H, d,  $J$  8.1,  $H_{\text{Ar}}$ ), 8.14 (1H, d,  $J$  8.6,  $H_{\text{Ar}}$ ) and 8.18 (1H, s,  $H_{\text{Ar}}$ );  $\delta_{\text{C}}$  (100 MHz;  $\text{CDCl}_3$ ) 11.9, 42.2, 47.7, 52.2, 52.4, 61.6, 66.3, 98.1, 103.7, 126.8, 127.0, 127.8, 128.3, 128.6, 129.2, 129.4, 129.6, 130.6, 131.6, 139.4, 150.0, 152.7 and 153.7;  $\nu_{\text{max}}/\text{cm}^{-1}$  2967, 2931 and 2788 (C-H), 1625 and 1505 (C=C), 1310 (C=N), 1122 (C-O) and 1073 (C-N); HRMS (ESI+):  $m/z$  calcd for  $[\text{C}_{27}\text{H}_{34}\text{N}_3\text{O}_2]^+$ : 432.2646; found: 432.2642

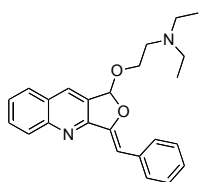

**(12)** yellow oil.  $\delta_{\text{H}}$  (300 MHz;  $\text{CDCl}_3$ ) 1.03 (6H, t,  $J$  7.1,  $\text{N}(\text{CH}_2\text{-CH}_3)_2$ ), 2.60 (4H, q,  $J$  7.1,  $\text{N}(\text{CH}_2\text{-CH}_3)_2$ ), 2.79 (2H, t,  $J$  6.3,  $\text{O-CH}_2\text{-CH}_2\text{-N}$ ), 3.85-4.02 (2H, m,  $\text{O-CH}_2\text{-CH}_2\text{-N}$ ), 6.72 (1H, s,  $=\text{CH-Ph}$ ), 6.75 (1H, s,  $\text{CH-O}$ ), 7.24 (1H, ddd,  $J$  1.1 and 7.3 and 7.3,  $H_{\text{Ar}}$ ), 7.39 (2H, dd,  $J$  7.3 and 7.9,  $H_{\text{Ar}}$ ), 7.51 (1H, ddd,  $J$  1.1 and 6.9 and 8.2,  $H_{\text{Ar}}$ ), 7.73 (1H, ddd,  $J$  1.4 and 6.9 and 8.5,  $H_{\text{Ar}}$ ), 7.82 (1H, dd,  $J$  1.1 and 8.2,  $H_{\text{Ar}}$ ), 7.89 (2H, dd,  $J$  1.3 and 7.9,  $H_{\text{Ar}}$ ), 8.15 (1H, d,  $J$  8.5,  $H_{\text{Ar}}$ ) and 8.18 (1H, s,  $H_{\text{Ar}}$ );  $\delta_{\text{C}}$  (125 MHz;  $(\text{CD}_3)_2\text{CO}$ ) 12.2, 48.3, 53.2,

68.0, 100.9, 106.2, 127.5, 127.6, 128.7, 129.3, 129.7, 129.9, 130.0, 130.1, 131.4, 132.6, 136.3, 150.7, 151.9 and 155.1;  $\nu_{\max}/\text{cm}^{-1}$  2965 and 2834 (C-H), 1620 and 1489 (C=C), 1234 (C=N), 1110 (C-O) and 1026 (C-N); HRMS (ESI+):  $m/z$  calcd for  $[\text{C}_{23}\text{H}_{26}\text{N}_3\text{O}_2]^+$ : 375.2073; found : 375.2073

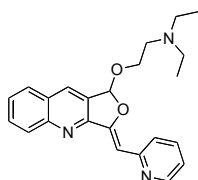

**(13)** Yellow oil.  $\delta_{\text{H}}$  (300 MHz;  $\text{CDCl}_3$ ) 1.00 (6H, t,  $J$  7.2,  $\text{N}(\text{CH}_2\text{-CH}_3)_2$ ), 2.57 (4H, q,  $J$  7.2,  $\text{N}(\text{CH}_2\text{-CH}_3)_2$ ), 2.76 (2H, t,  $J$  6.3,  $\text{O-CH}_2\text{-CH}_2\text{-N}$ ), 3.83-3.96 (2H, m,  $\text{O-CH}_2\text{-CH}_2\text{-N}$ ), 6.78 (1H, s,  $\text{CH-O}$ ), 6.97 (1H, s,  $=\text{CH-C}_5\text{H}_5\text{N}$ ), 7.07 (1H, ddd,  $J$  1.0 and 4.9 and 7.4,  $H_{\text{Ar}}$ ), 7.53 (1H, ddd,  $J$  1.0 and 7.0 and 8.0,  $H_{\text{Ar}}$ ), 7.66 (1H, ddd,  $J$  1.8 and 7.4 and 7.4,  $H_{\text{Ar}}$ ), 7.74 (1H, ddd,  $J$  1.4 and 7.0 and 8.4,  $H_{\text{Ar}}$ ), 7.83 (1H, dd,  $J$  1.0 and 8.0,  $H_{\text{Ar}}$ ), 8.14 (1H, d,  $J$  7.4,  $H_{\text{Ar}}$ ), 8.16 (1H, d,  $J$  8.4,  $H_{\text{Ar}}$ ), 8.21 (1H, s,  $H_{\text{Ar}}$ ) and 8.61 (1H, d,  $J$  4.9,  $H_{\text{Ar}}$ );  $\delta_{\text{C}}$  (75 MHz;  $\text{CDCl}_3$ ) 11.7, 47.6, 52.4, 66.7, 101.7, 105.4, 121.0, 124.2, 127.2, 127.9, 128.6, 128.7, 129.9, 130.8, 131.5, 136.1, 149.6, 150.2, 153.3, 154.2 and 154.8;  $\nu_{\max}/\text{cm}^{-1}$  2967 and 2808 (C-H), 1582 and 1465 (C=C), 1341 (C=N), 1099 and 1070 (C-O and C-N)

HRMS (ESI+):  $m/z$  calcd for  $[\text{C}_{23}\text{H}_{25}\text{N}_3\text{O}_2\text{Na}]^+$ : 398.1844; found: 398.1845.

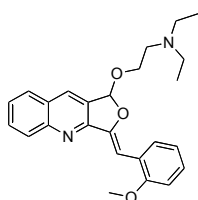

**(14)** Yellow oil.  $\delta_{\text{H}}$  (300 MHz;  $\text{CDCl}_3$ ) 1.03 (6H, t,  $J$  7.1,  $\text{N}(\text{CH}_2\text{-CH}_3)_2$ ), 2.58 (4H, q,  $J$  7.1,  $\text{N}(\text{CH}_2\text{-CH}_3)_2$ ), 2.78 (2H, t,  $J$  6.4,  $\text{O-CH}_2\text{-CH}_2\text{-N}$ ), 3.81-3.98 (2H, m,  $\text{O-CH}_2\text{-CH}_2\text{-N}$ ), 3.98 (3H, s,  $\text{O-CH}_3$ ), 6.75 (1H, s,  $\text{CH-O}$ ), 6.91 (1H, dd,  $J$  0.8 and 8.2,  $H_{\text{Ar}}$ ), 7.02 (1H, ddd,  $J$  0.8 and 7.6 and 7.8,  $H_{\text{Ar}}$ ), 7.23 (1H, ddd,  $J$  1.7 and 7.6 and 8.2,  $H_{\text{Ar}}$ ), 7.25 (1H, s,  $=\text{CH}(\text{2-MeO-Ph})$ ), 7.52 (1H, ddd,  $J$  1.1 and 6.9 and 8.1,  $H_{\text{Ar}}$ ), 7.74 (1H, ddd,  $J$  1.4 and 6.9 and 8.4,  $H_{\text{Ar}}$ ), 7.84 (1H, dd,  $J$  1.4 and 8.1,  $H_{\text{Ar}}$ ), 8.18 (1H, d,  $J$  8.4,  $H_{\text{Ar}}$ ), 8.19 (1H, s,  $H_{\text{Ar}}$ ) and 8.35 (1H, dd,  $J$  1.7 and 7.8,  $H_{\text{Ar}}$ );  $\delta_{\text{C}}$  (75 MHz;  $\text{CDCl}_3$ ) 11.4, 47.5, 52.2, 55.6, 66.1, 94.8, 104.7, 110.4, 120.6, 124.2, 126.6, 127.7, 128.1, 128.6, 128.7, 129.6, 130.0, 130.6, 131.5, 150.2, 150.7, 154.9 and 157.0;  $\nu_{\max}/\text{cm}^{-1}$  2965, 2932 and 2834 (C-H), 1620 and 1489 (C=C), 1234 (C=N), 1110 (C-O) and 1055 (C-N); HRMS (ESI+):  $m/z$  calcd for  $[\text{C}_{25}\text{H}_{29}\text{N}_2\text{O}_3]^+$ : 405.2173; found: 405.2172

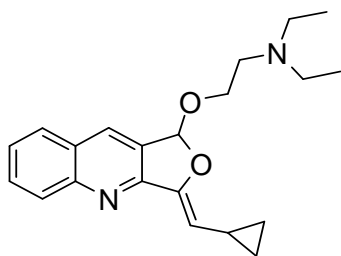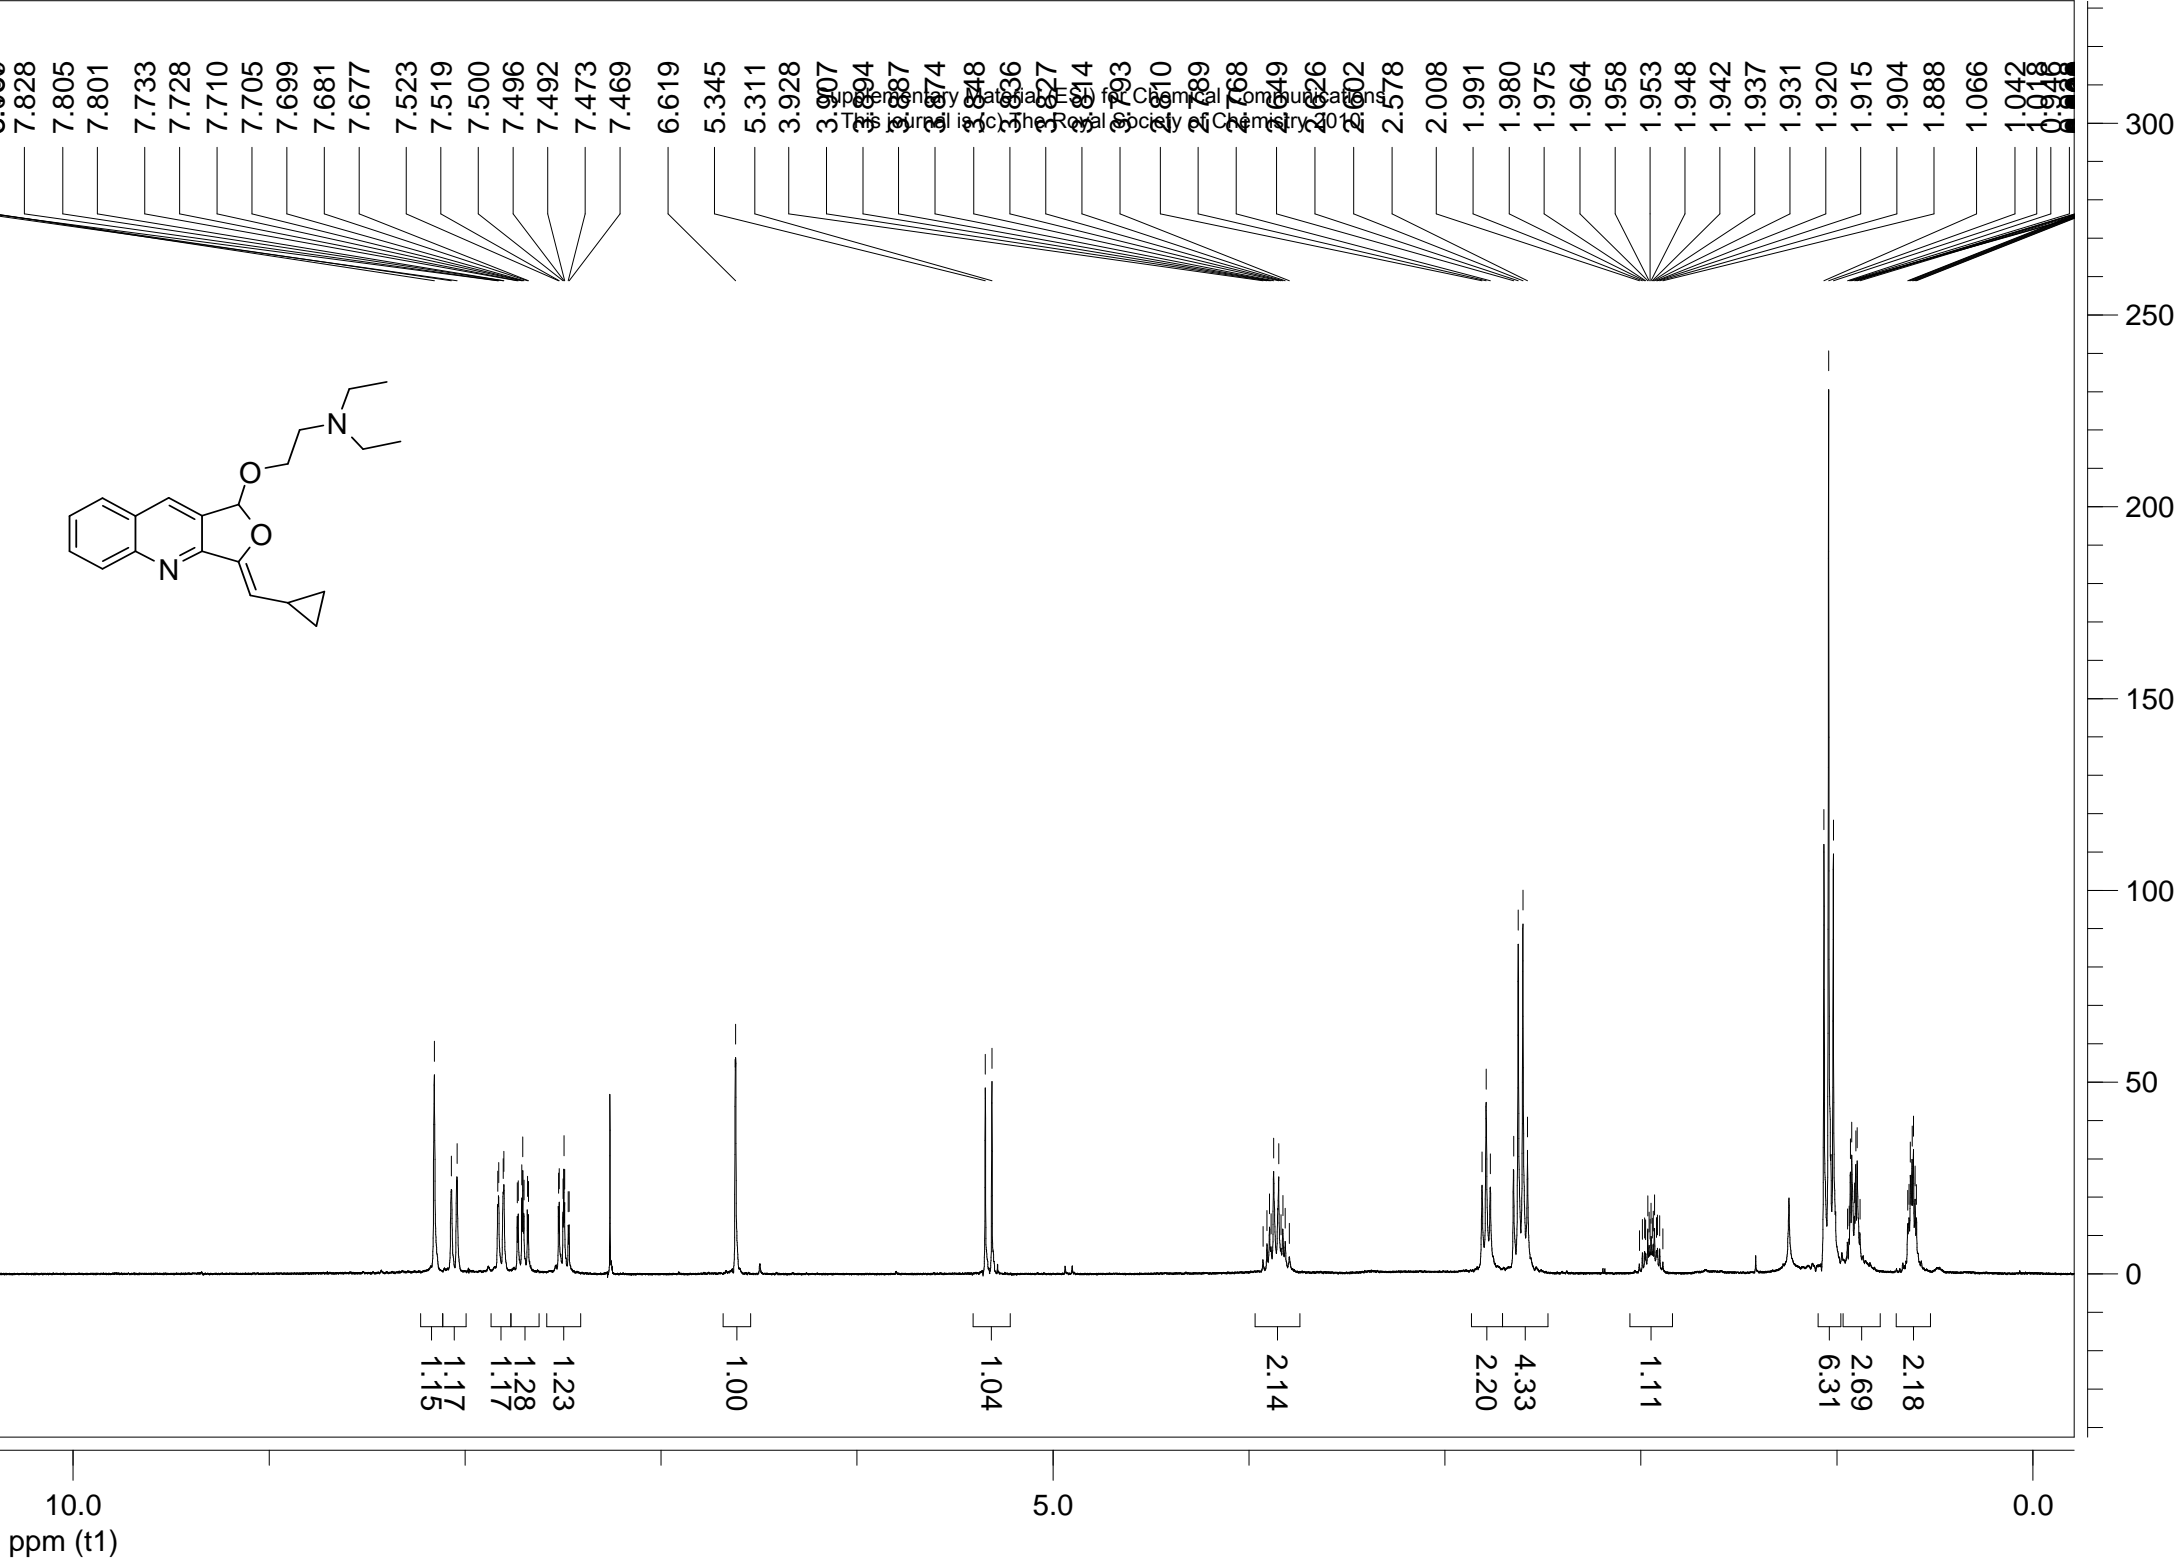

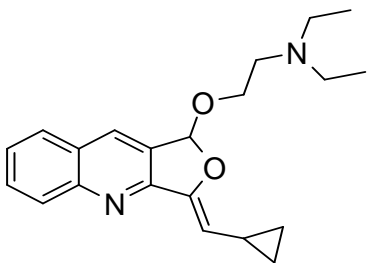

153.845  
150.428  
149.936  
131.596  
130.495  
129.286  
129.035  
128.605  
127.579  
126.387

107.365  
103.670

66.054

52.447

47.690

11.750

8.822

7.992

7.826

Supplementary Material (ESI) for Chemical Communications  
This journal is © The Royal Society of Chemistry 2010

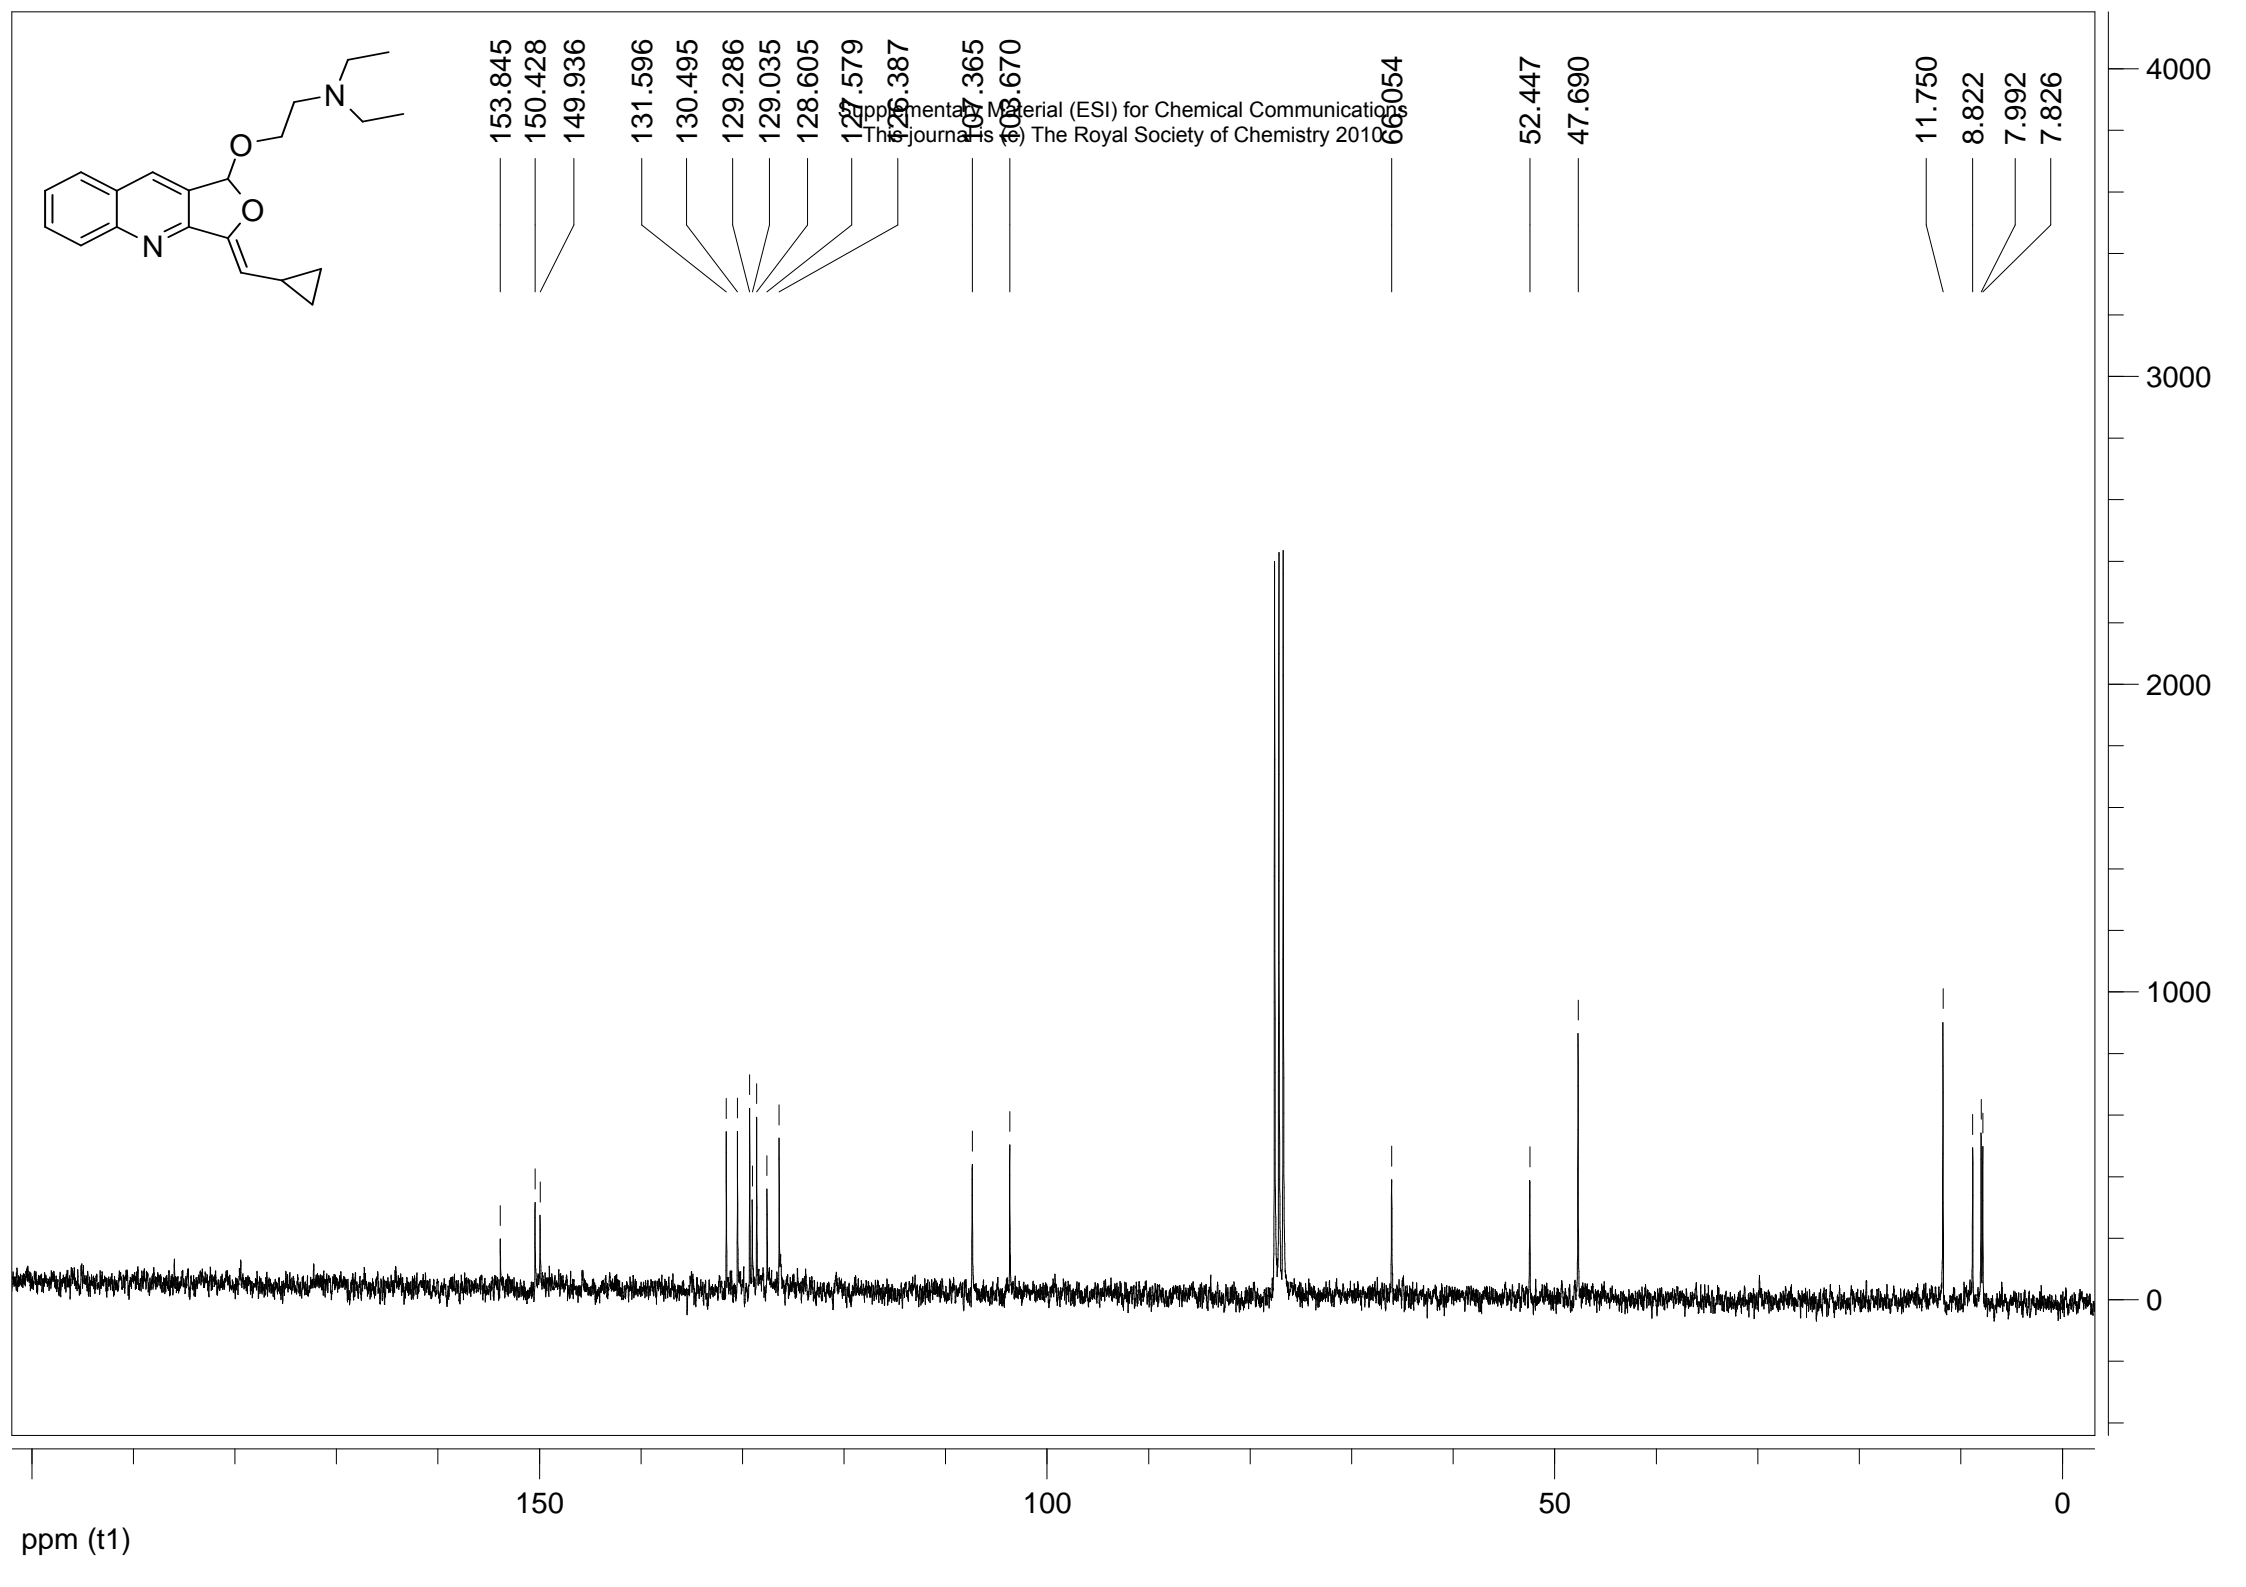

ppm (t1)

150

100

50

0

4000

3000

2000

1000

0

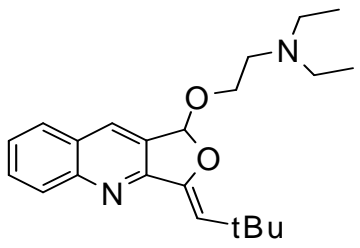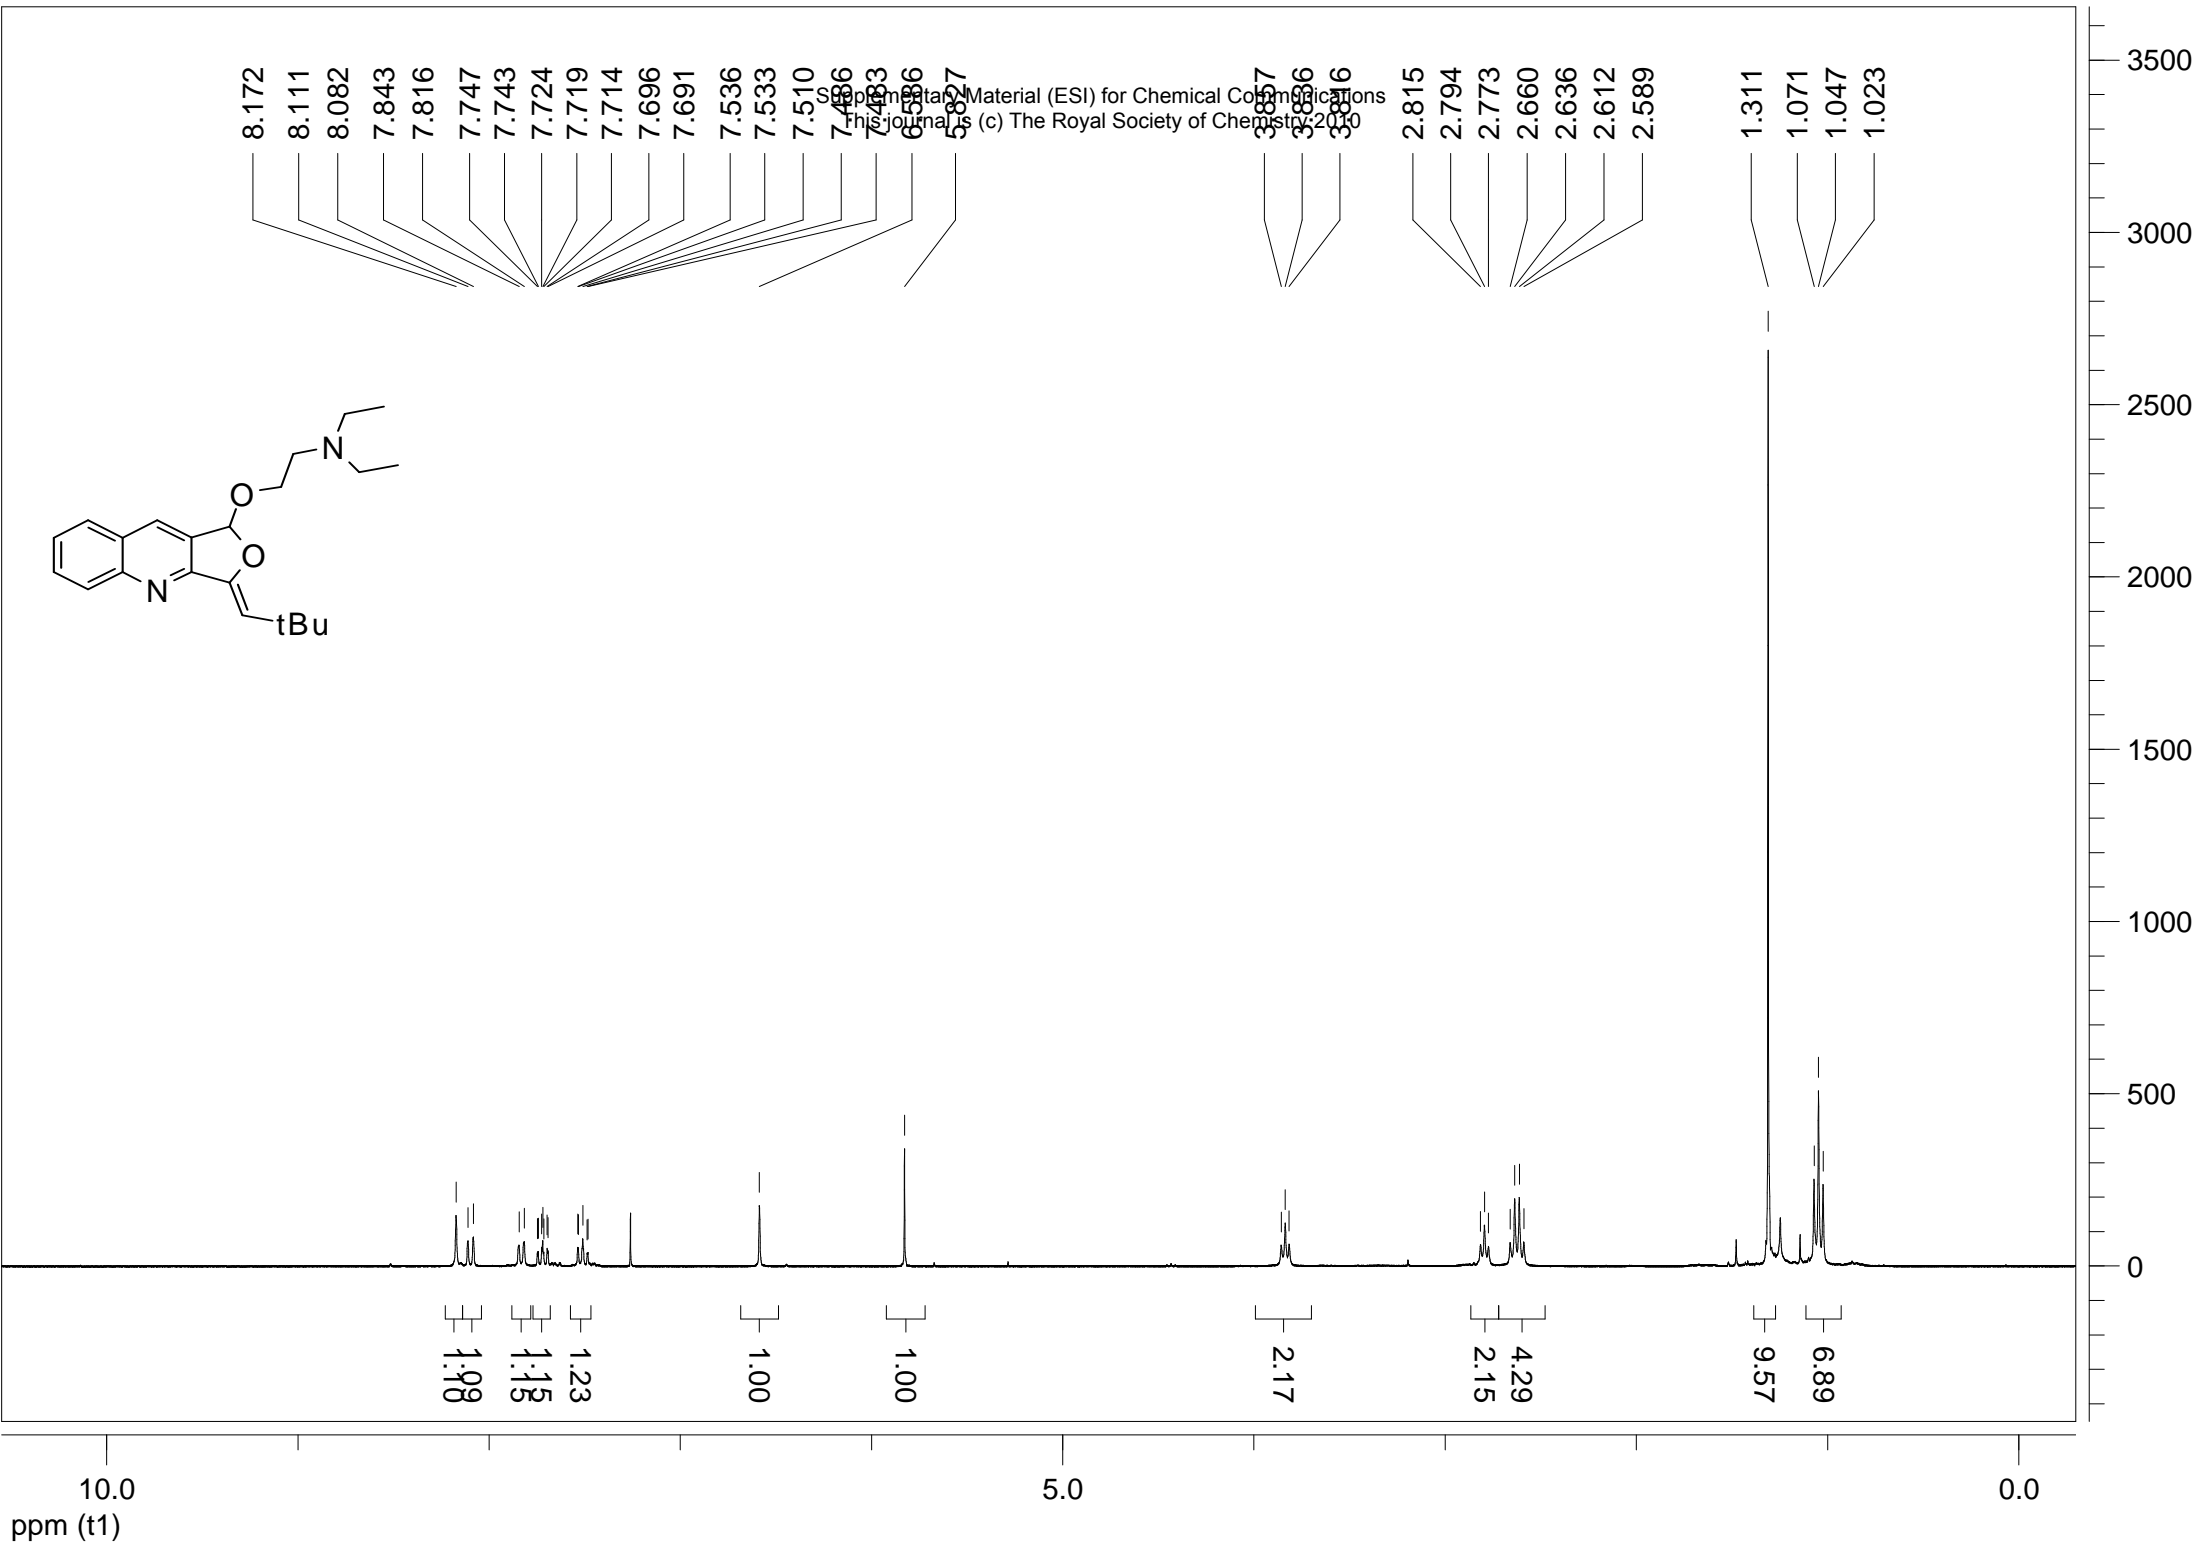

Supplementary Material (ESI) for Chemical Communications  
 This journal is (c) The Royal Society of Chemistry 2010



$^{13}\text{C}$  NMR -  $\text{CDCl}_3$  - 75MHz

Supplementary Material (ESI) for Chemical Communications  
This journal is (c) The Royal Society of Chemistry 2010

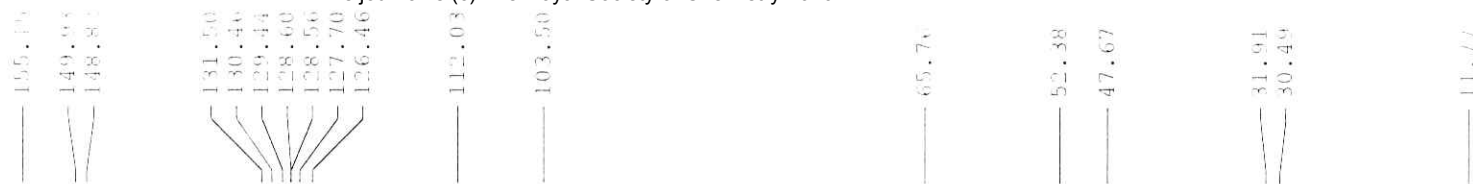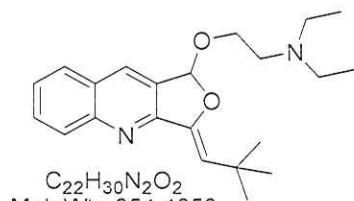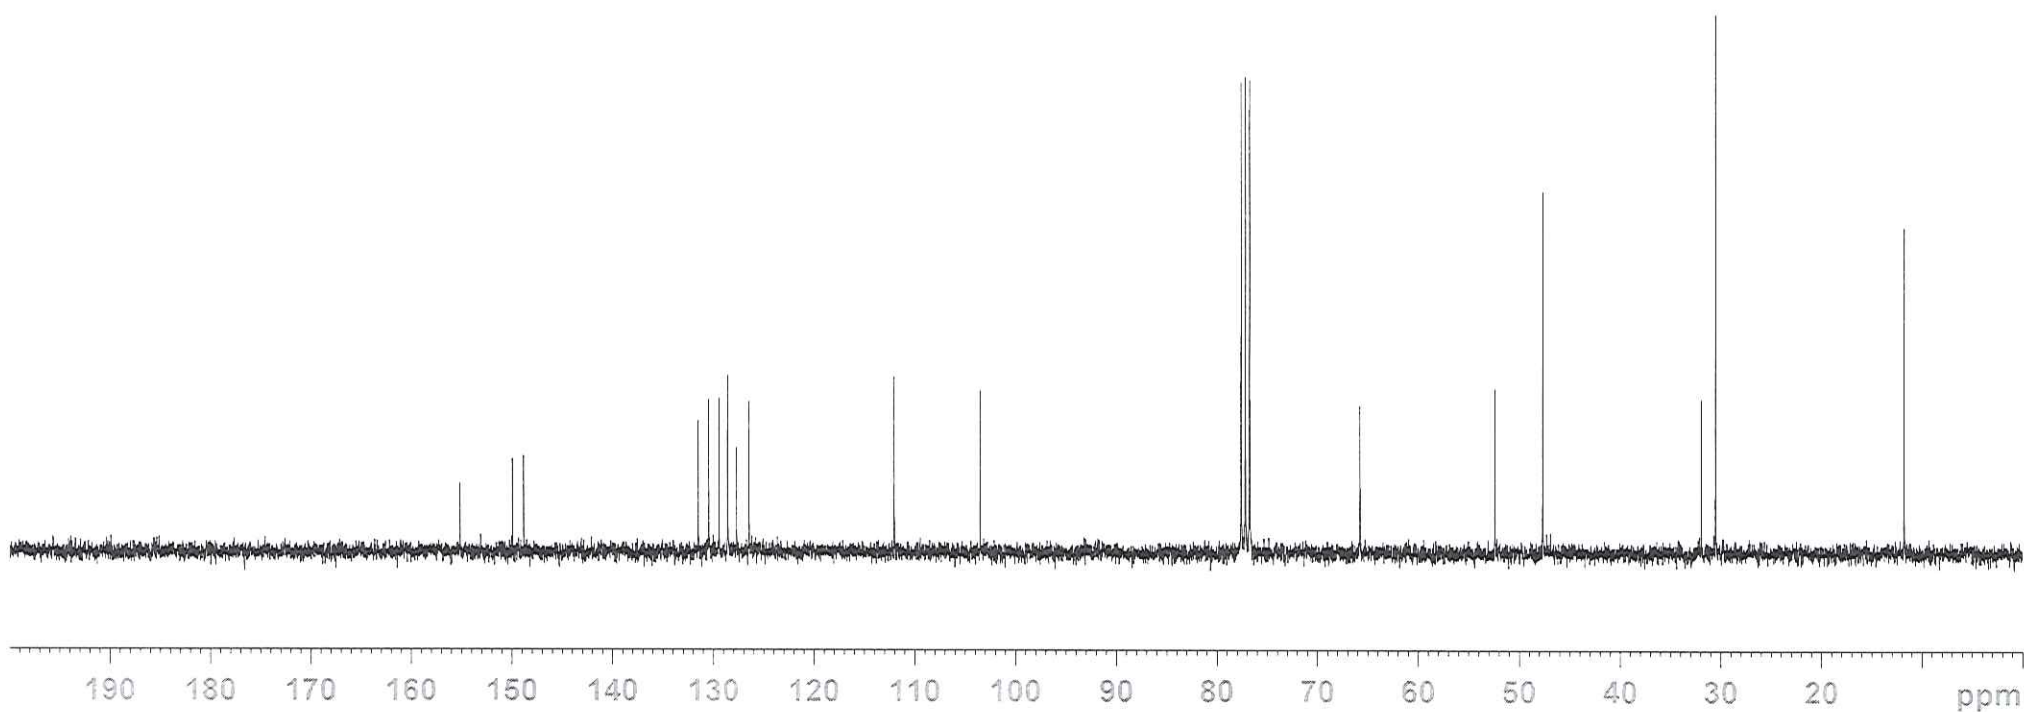

<sup>1</sup>H - CDCl<sub>3</sub> - 300MHz

Supplementary Material (ESI) for Chemical Communications  
This journal is (c) The Royal Society of Chemistry 2010

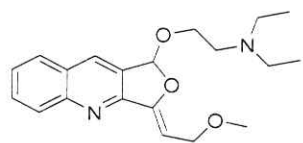

C<sub>20</sub>H<sub>26</sub>N<sub>2</sub>O<sub>3</sub>  
Mol. Wt.: 342.4320

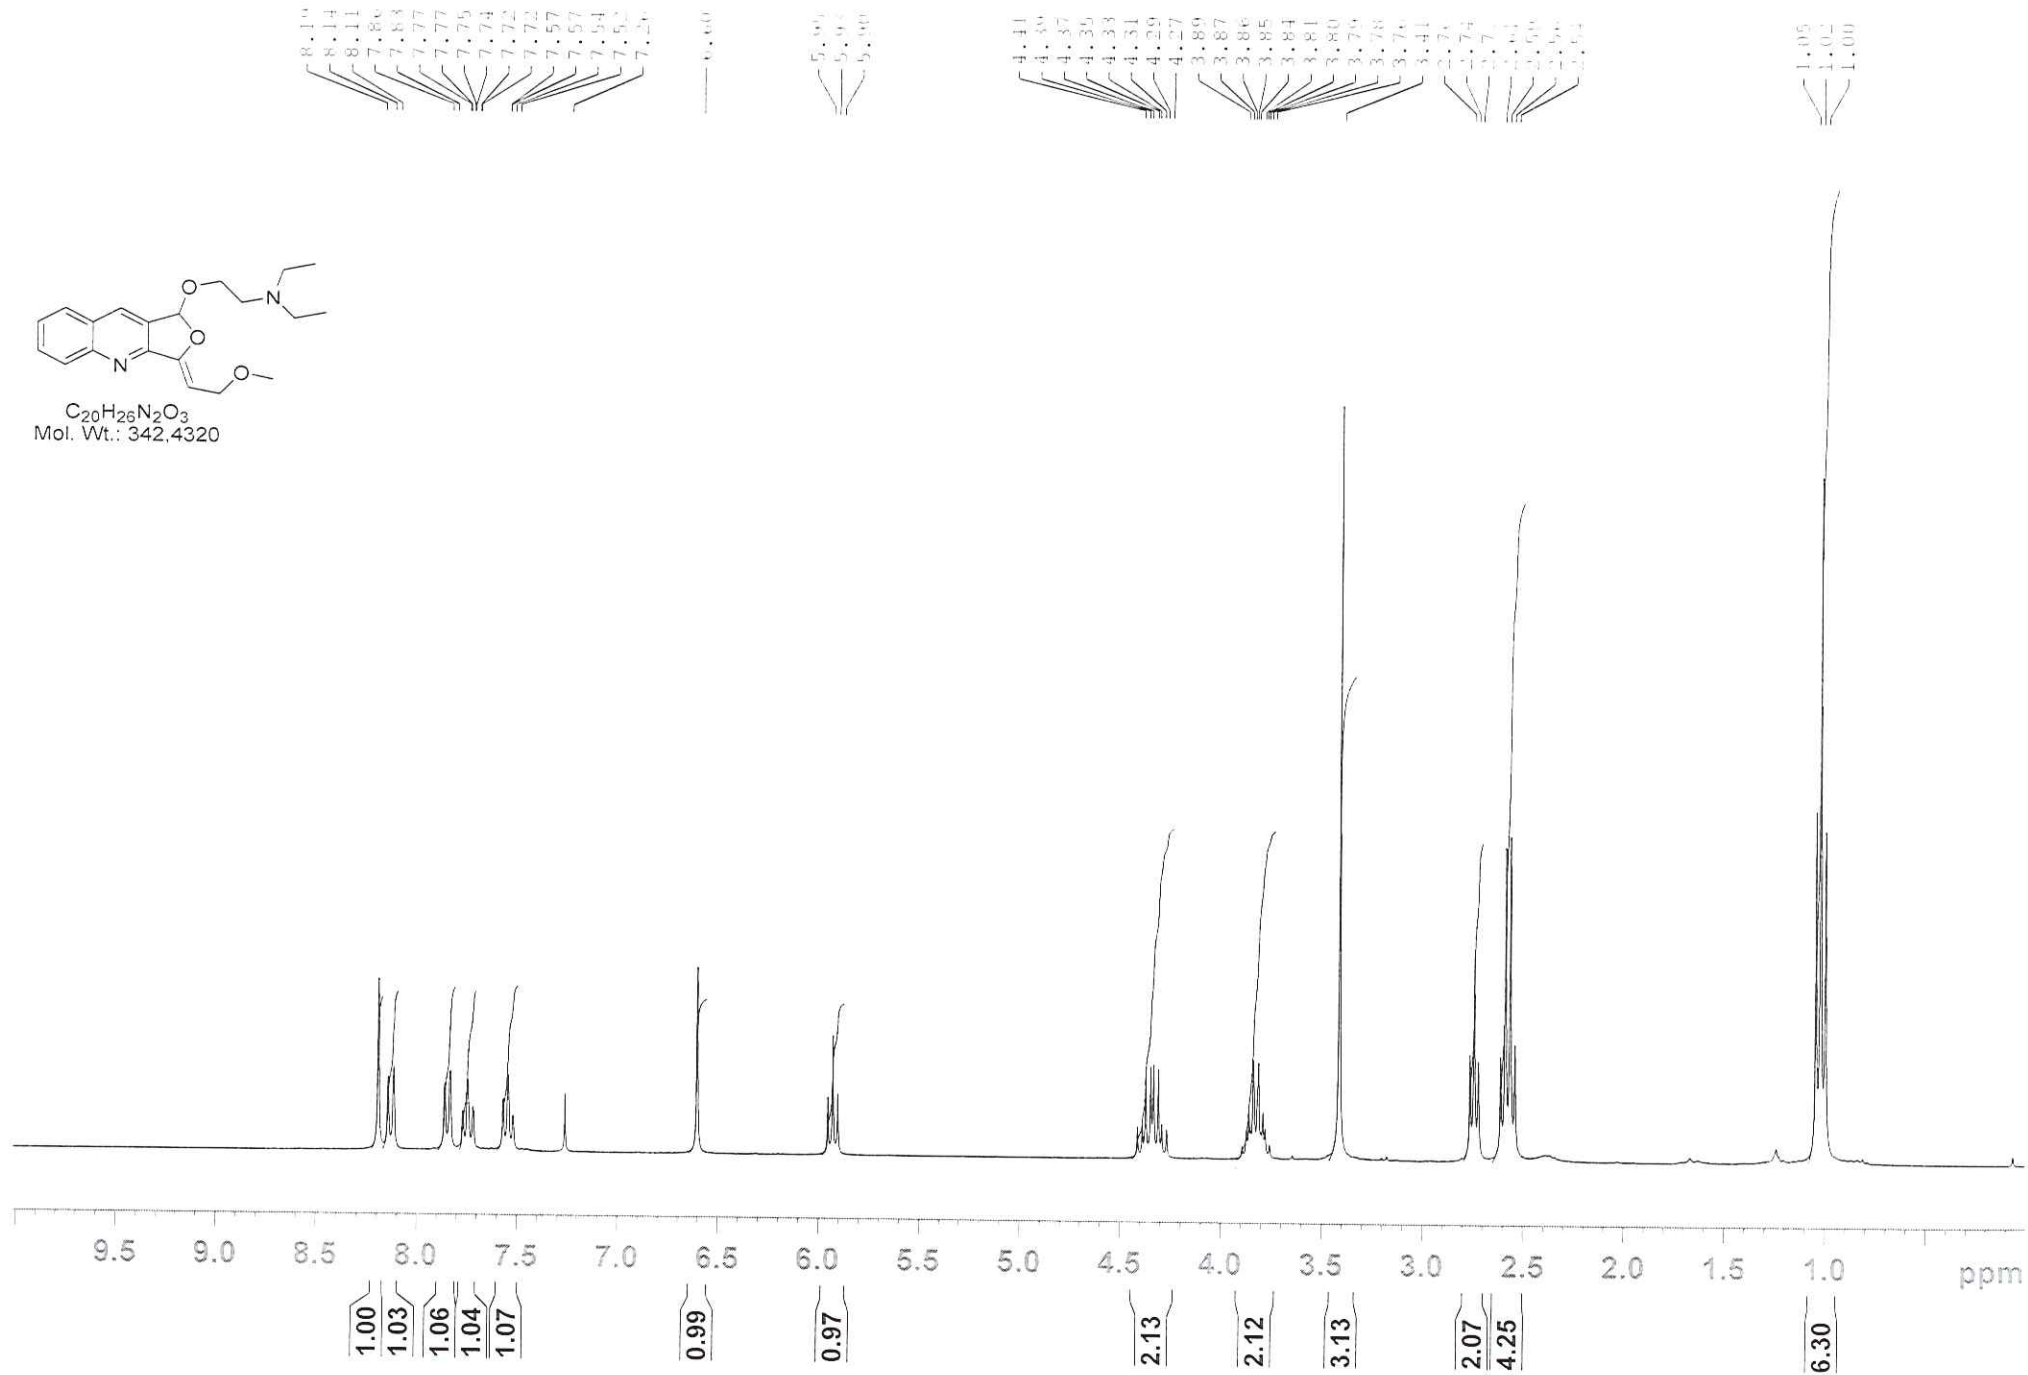

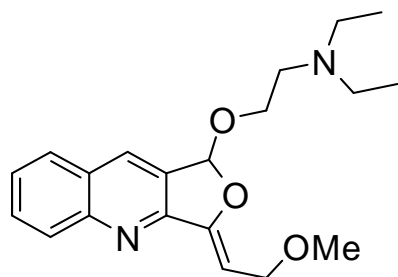

153.454

152.986

150.019

131.623

130.649

129.702

129.321

128.582

127.892

126.992

101.080

97.402

66.340

66.292

57.907

52.334

47.655

29.798

11.611

Supplementary Material (ESI) for Chemical Communication  
This journal is (c) The Royal Society of Chemistry 2010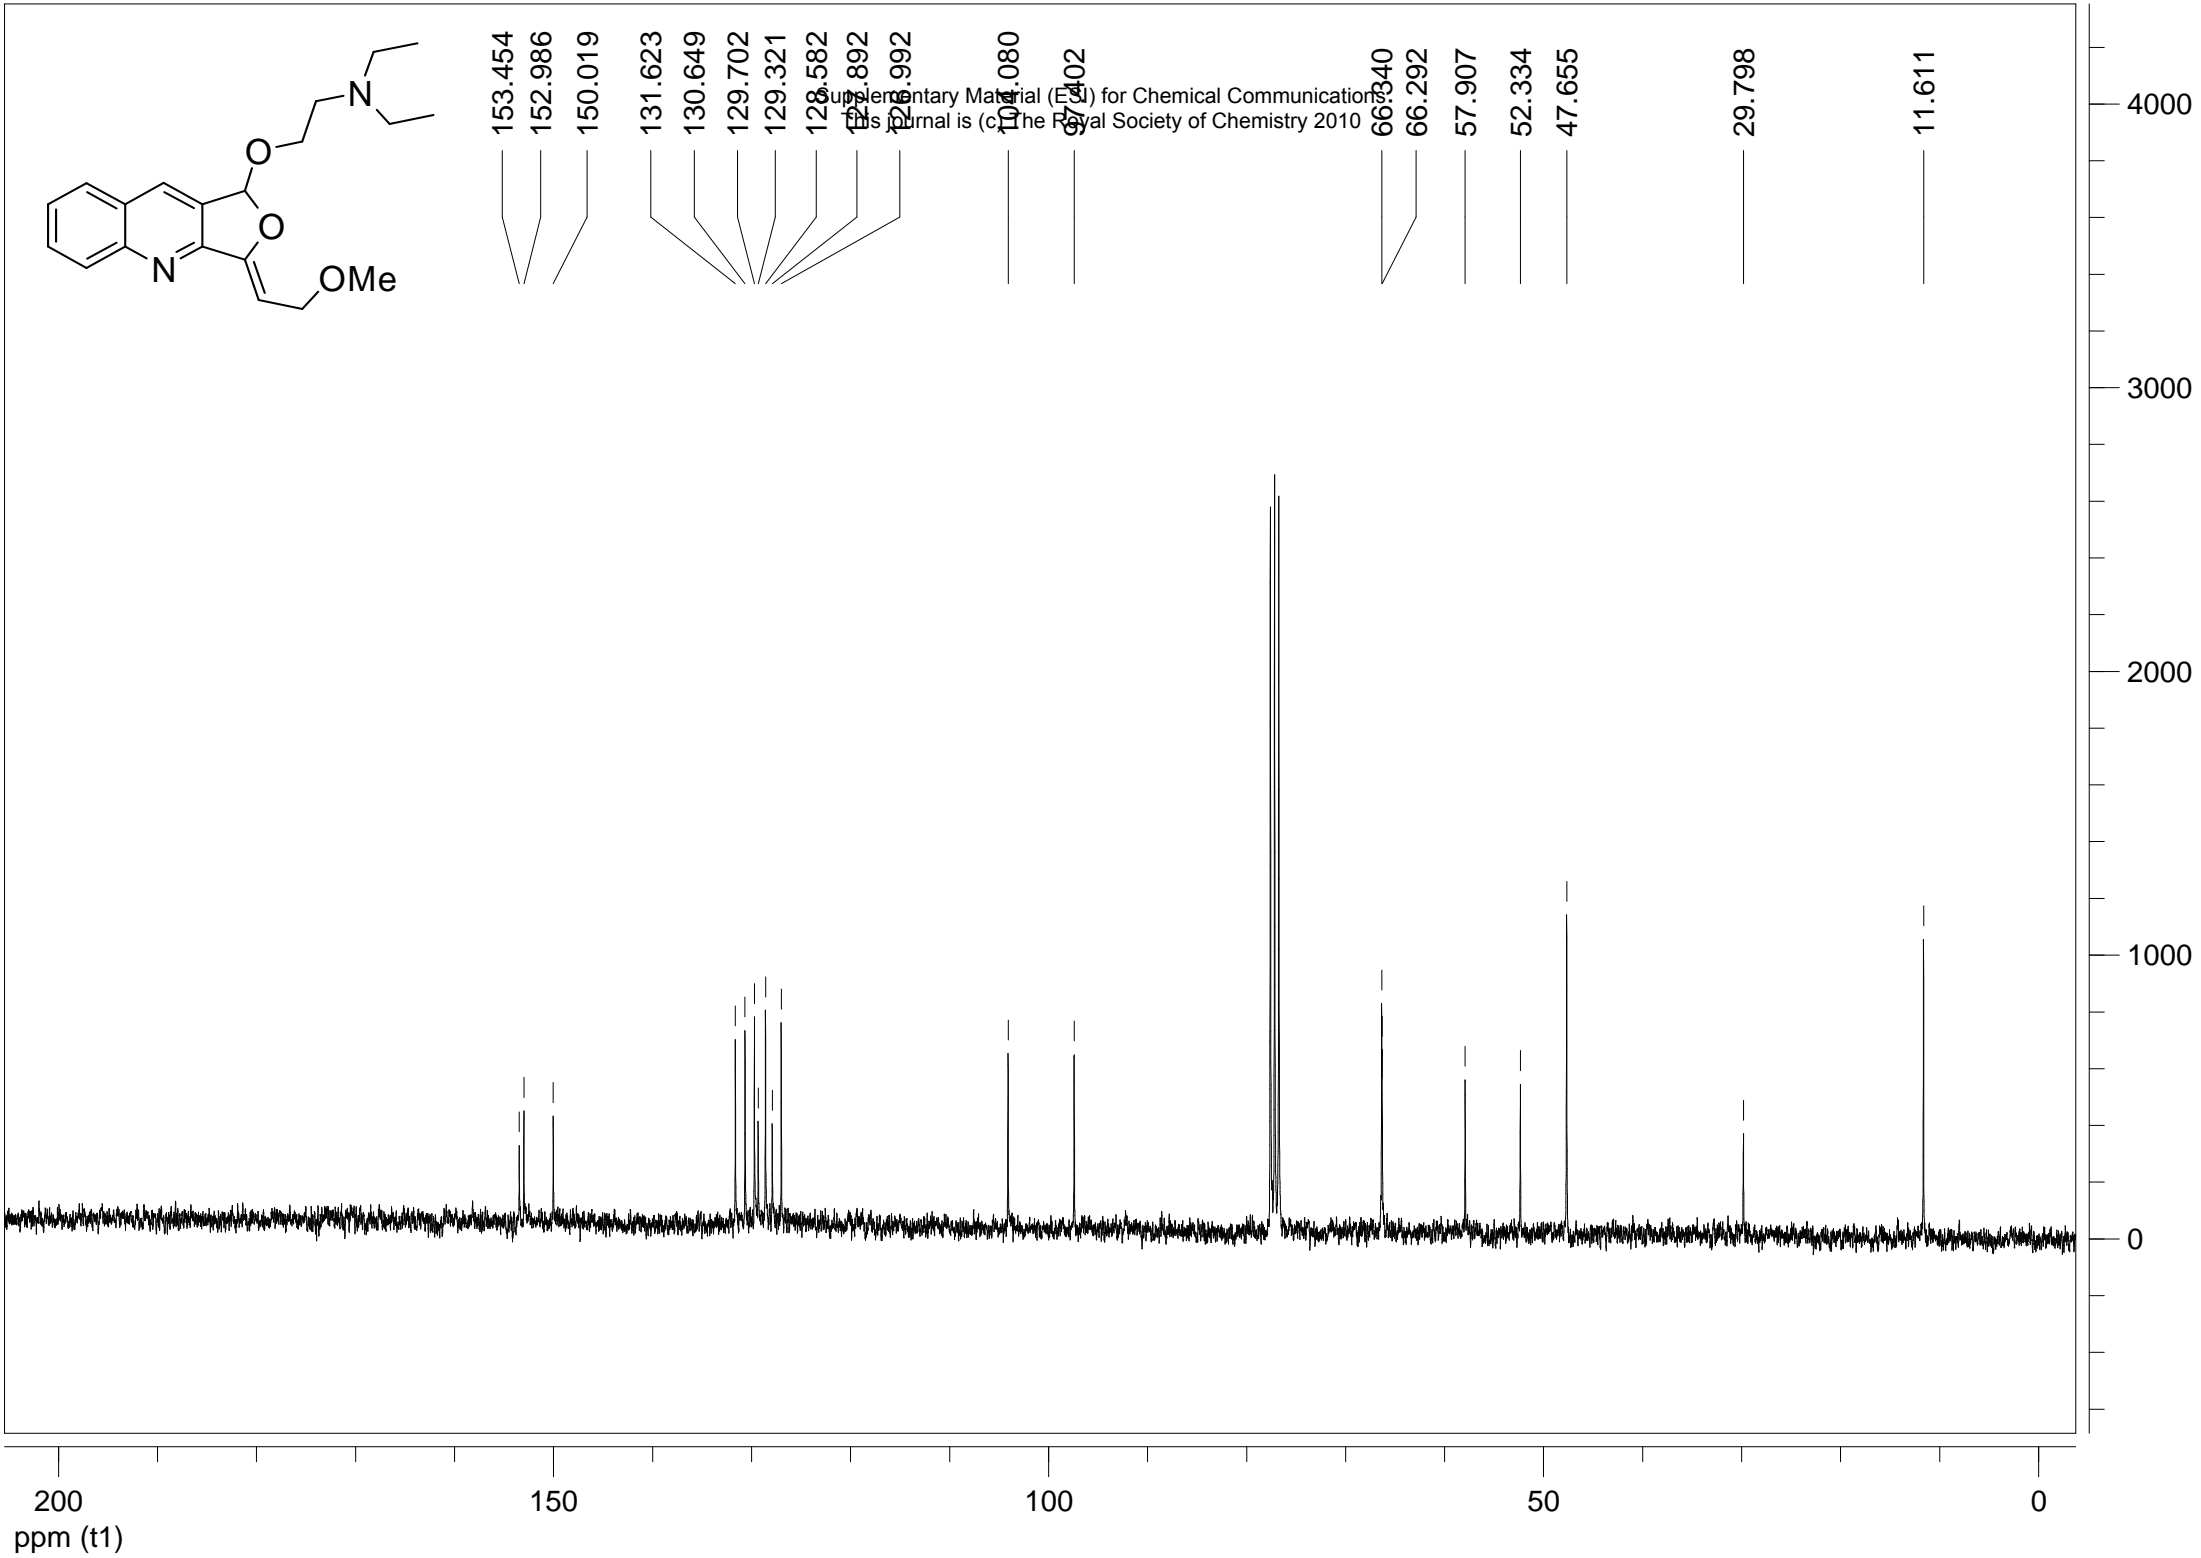200  
ppm (t1)

150

100

50

0

4000

3000

2000

1000

0

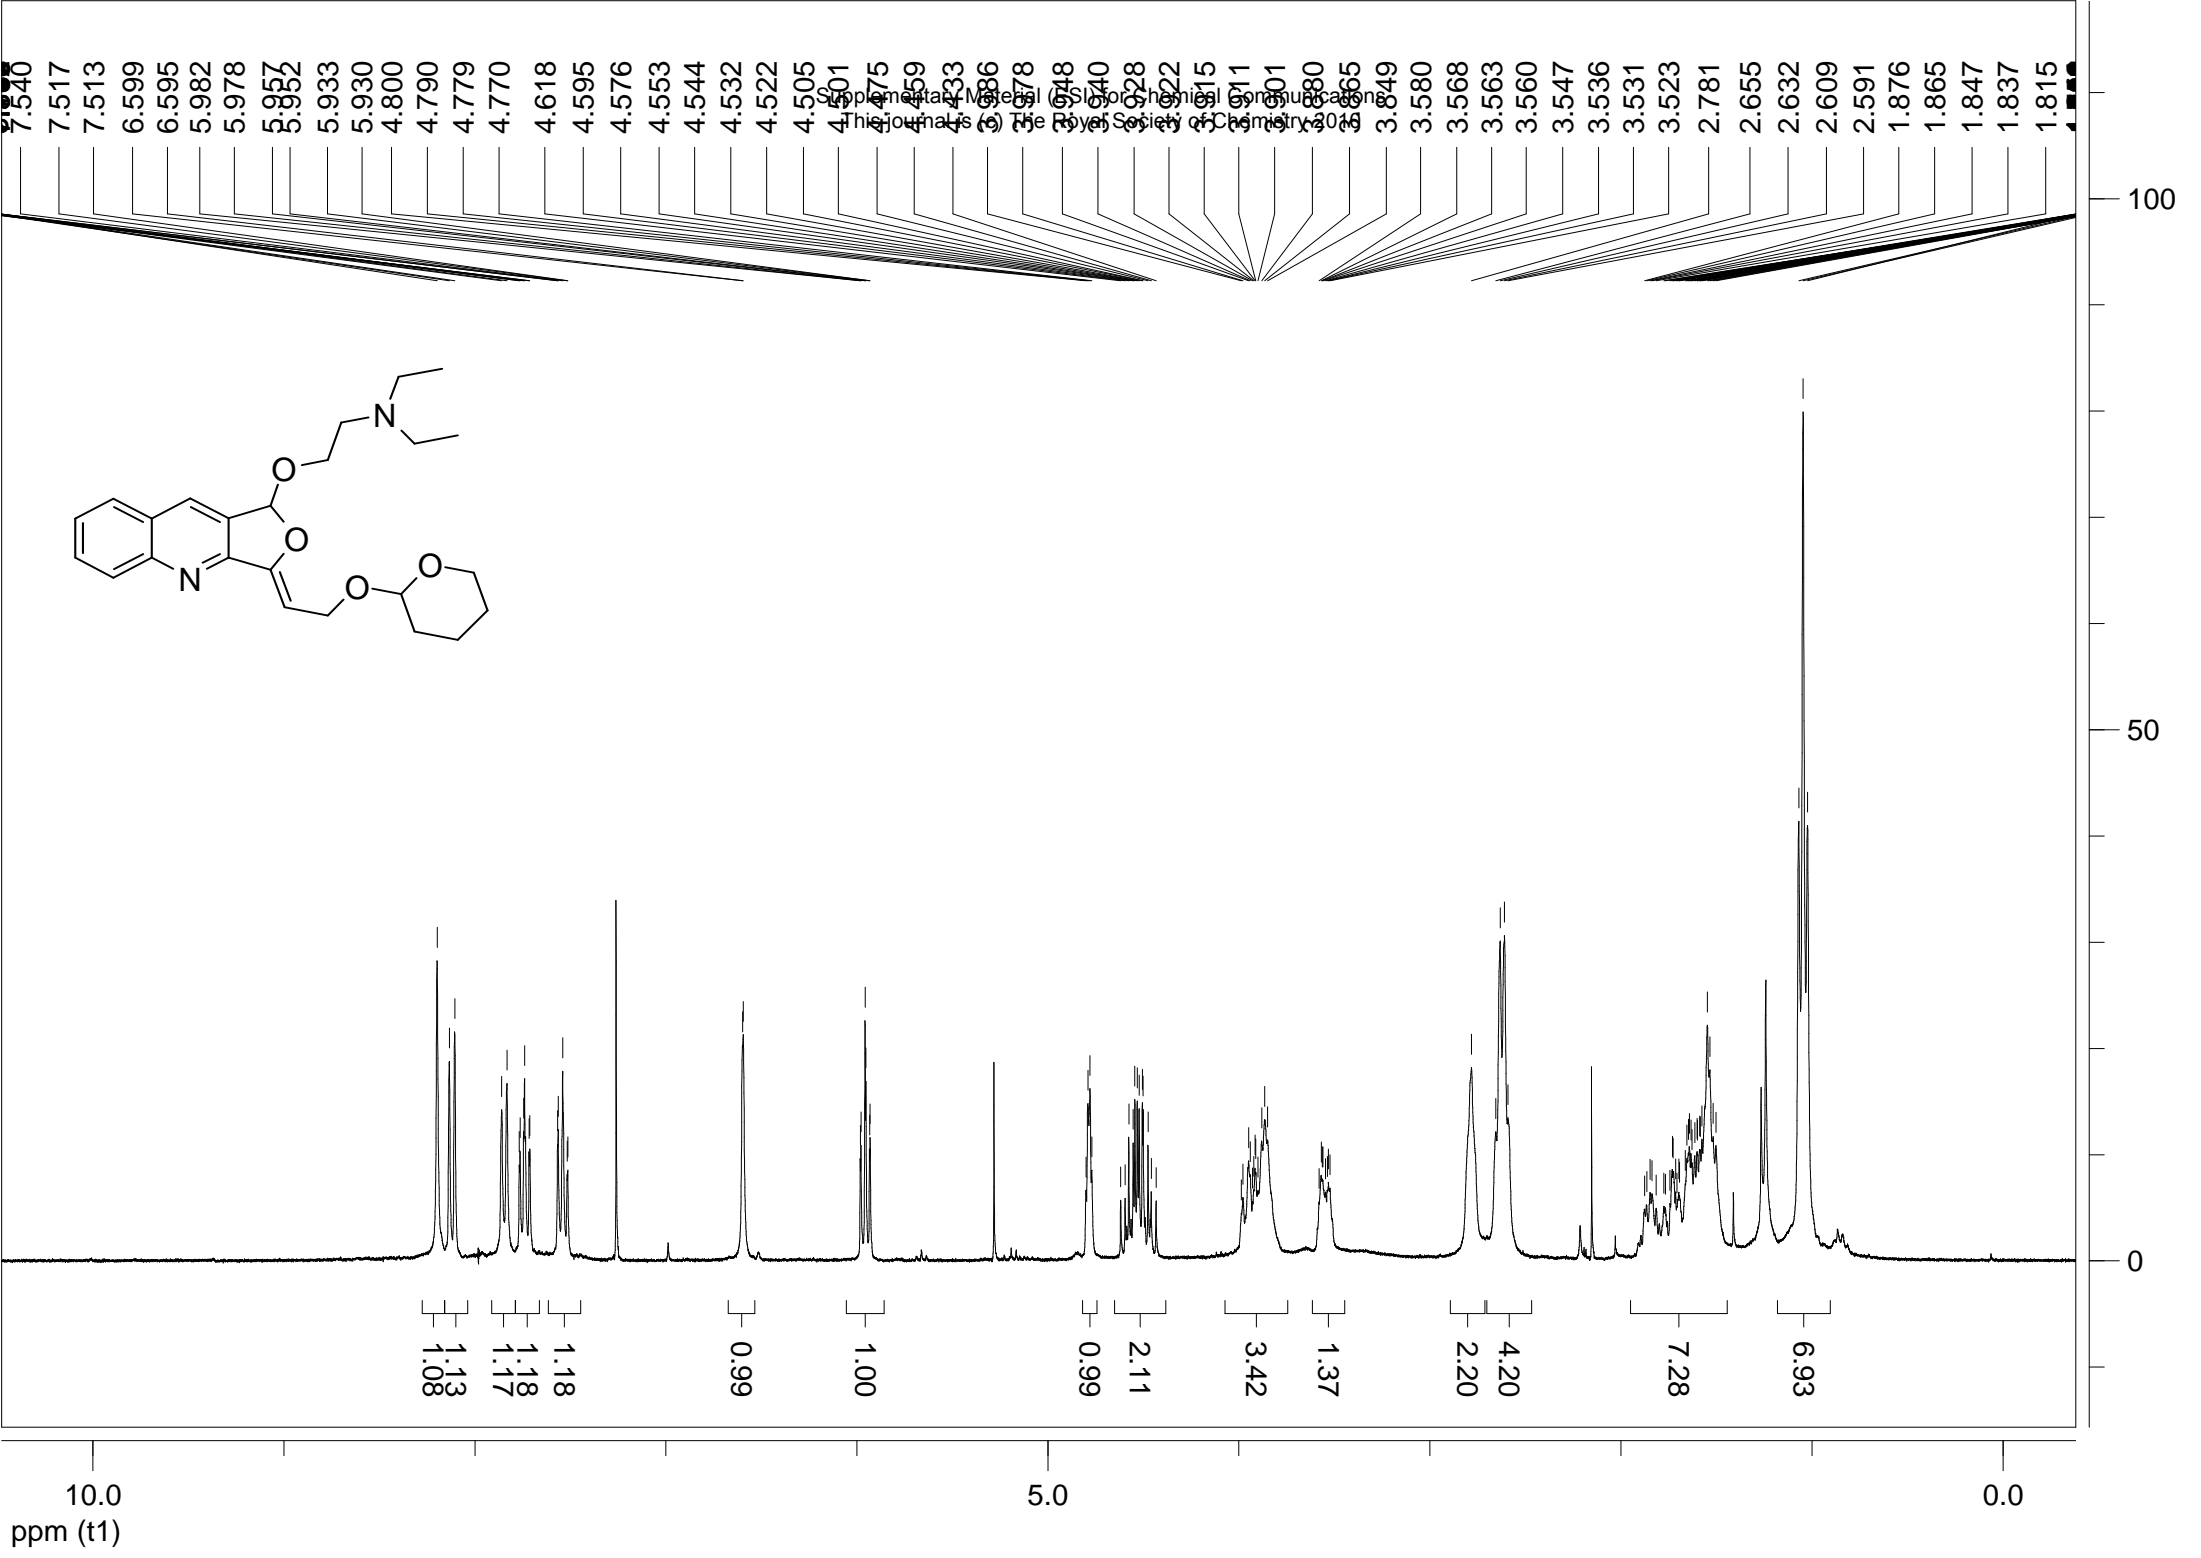

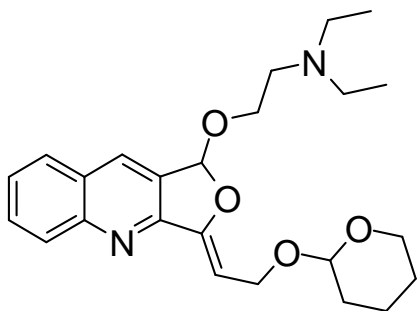

153.590  
152.577  
150.022  
131.626  
130.636  
129.695  
129.376  
128.605  
127.887  
127.956  
101.114  
100.046  
77.812  
77.770  
77.694  
62.258  
62.218  
62.084  
61.120  
52.337  
47.699  
30.844  
30.799  
25.667  
19.536  
19.445  
11.622

Supplementary Material (ESI) for Chemical Communications  
This journal is © The Royal Society of Chemistry 2010

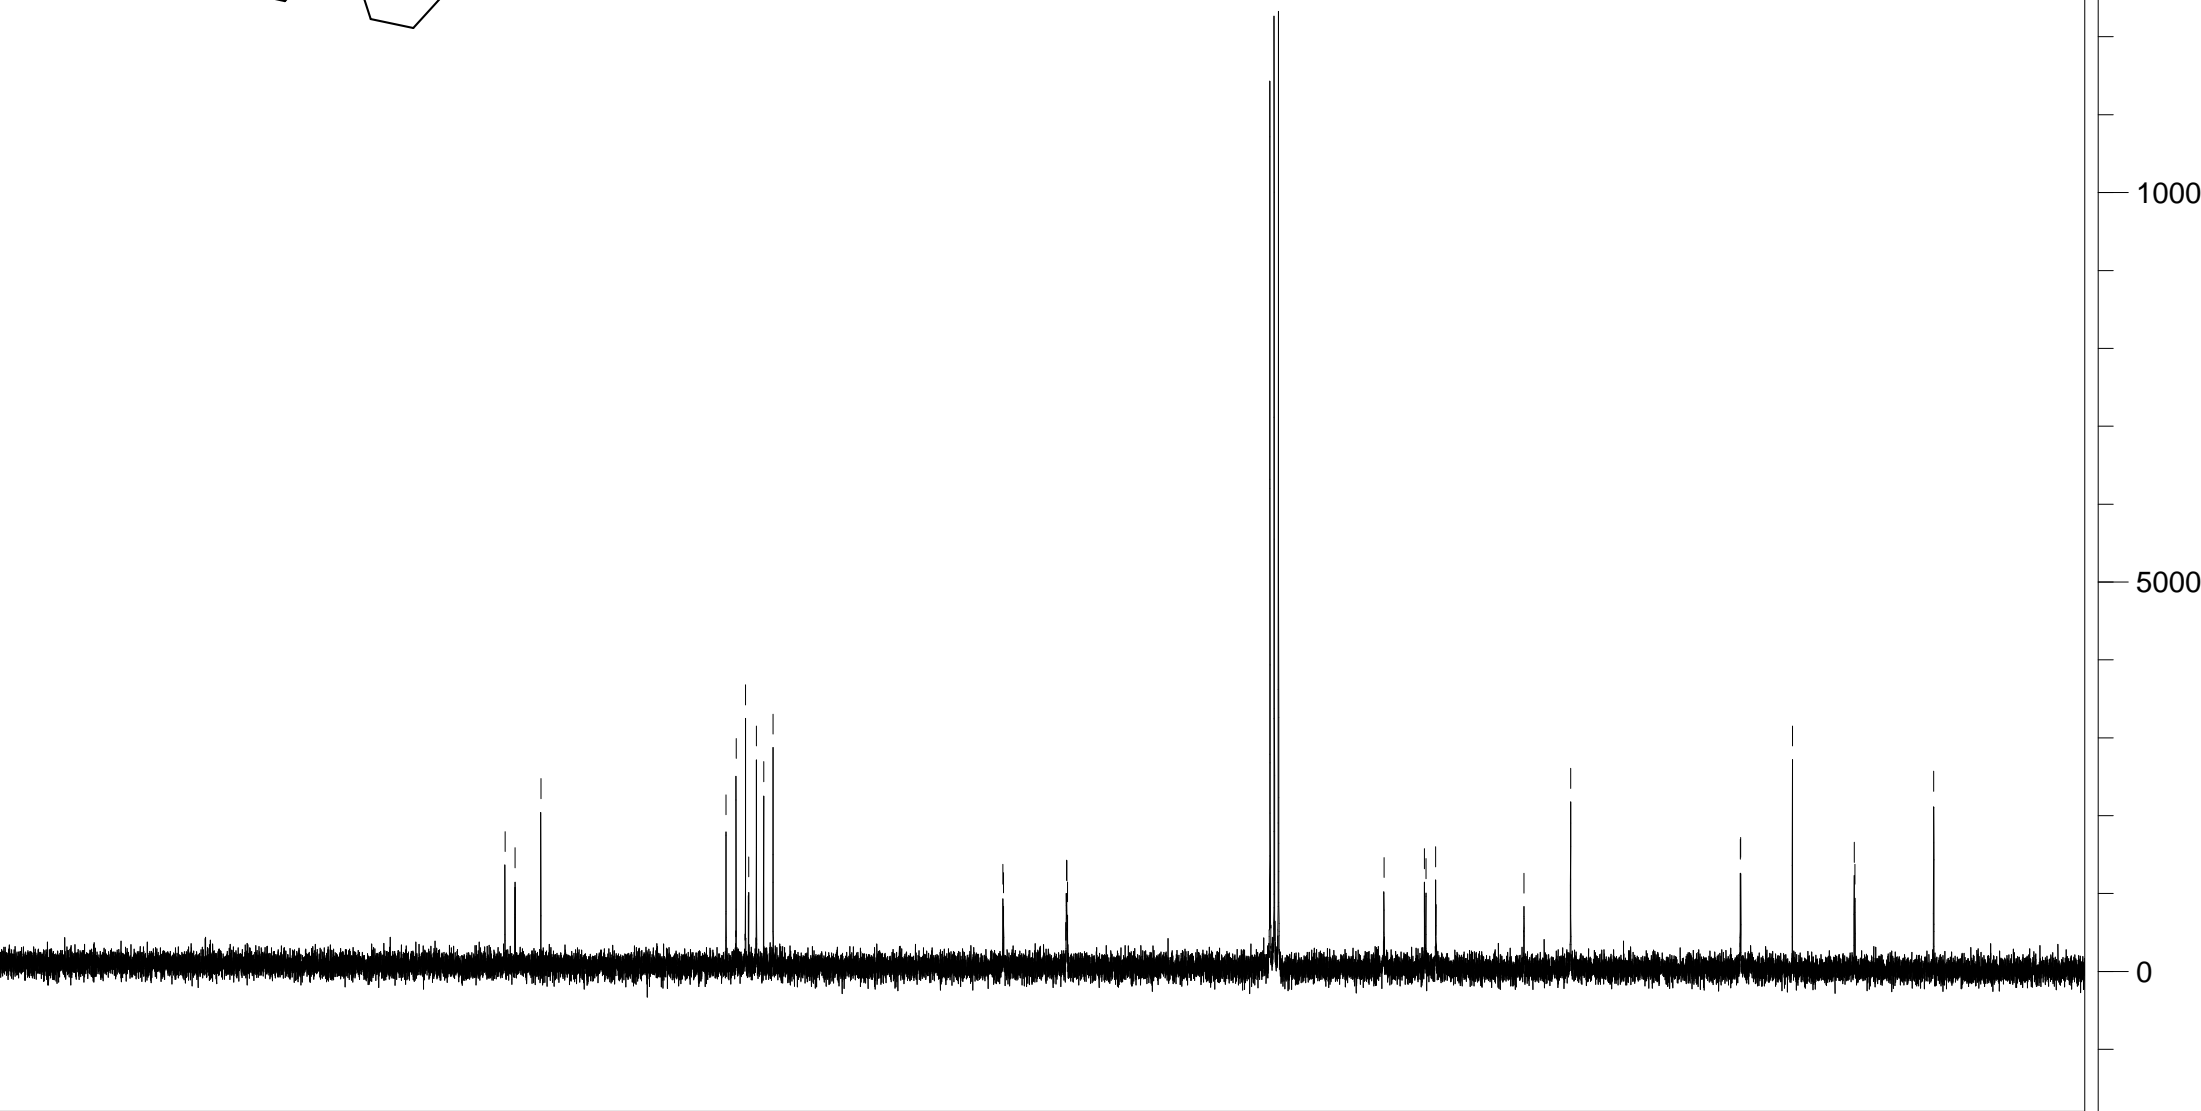

200  
ppm (f1)  
150  
100  
50  
0

$^1\text{H}$  -  $\text{CDCl}_3$  - 400MHz

Supplementary Material (ESI) for Chemical Communications  
This journal is (c) The Royal Society of Chemistry 2010

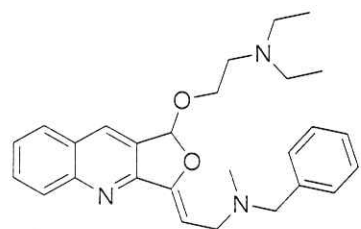

$\text{C}_{27}\text{H}_{33}\text{N}_3\text{O}_2$   
Mol. Wt.: 431,5698

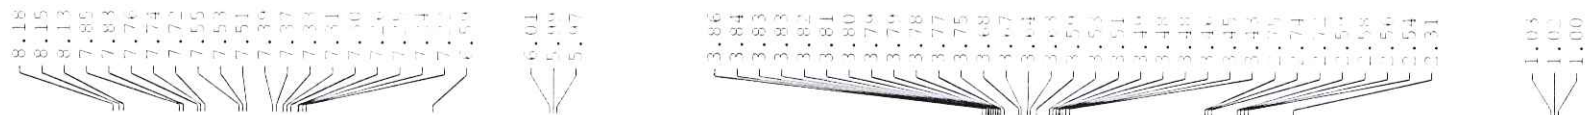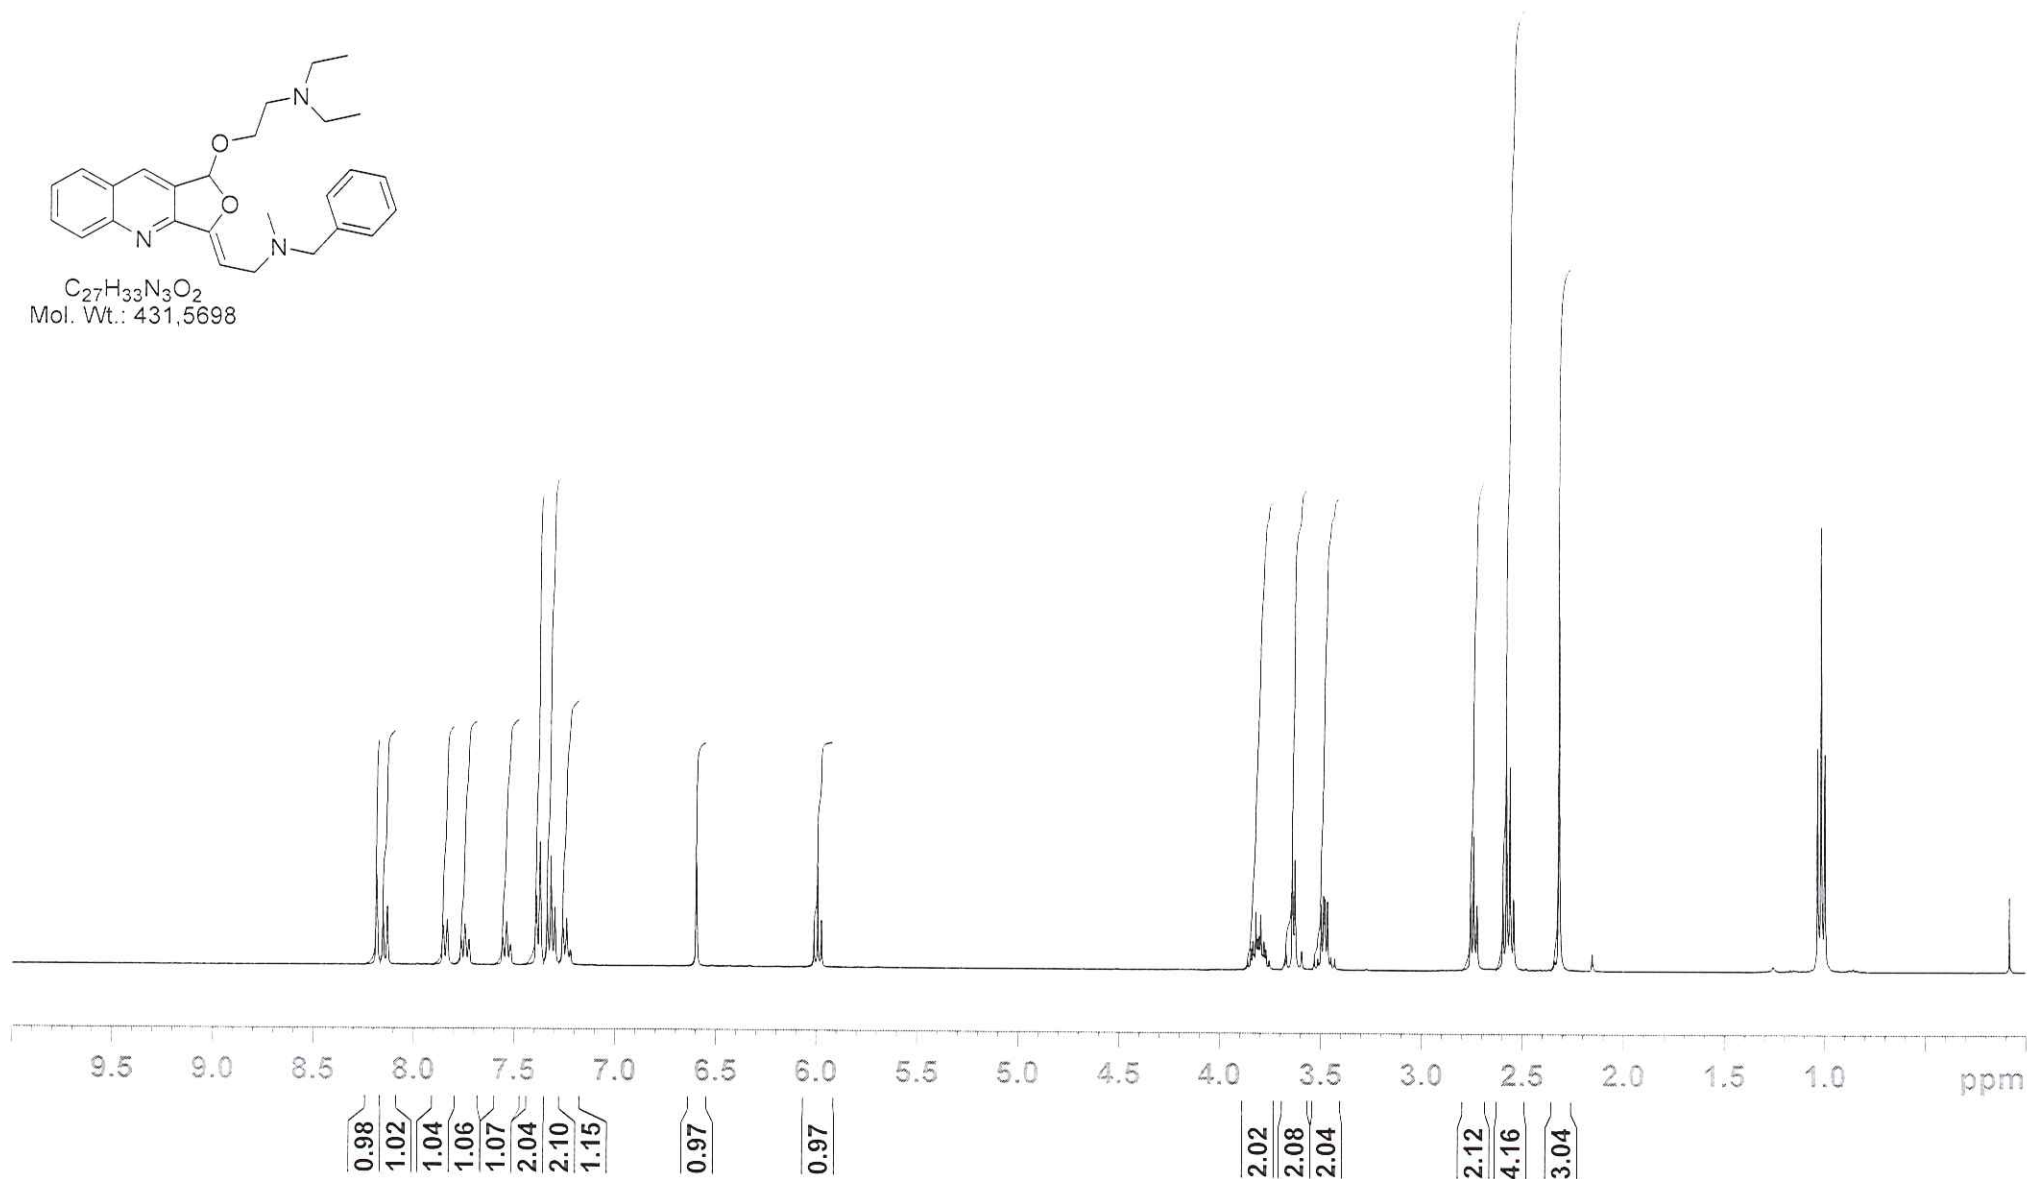

$^{13}\text{C}$  NMR -  $\text{CDCl}_3$  - 100MHz

Supplementary Material (ESI) for Chemical Communications  
This journal is (c) The Royal Society of Chemistry 2010

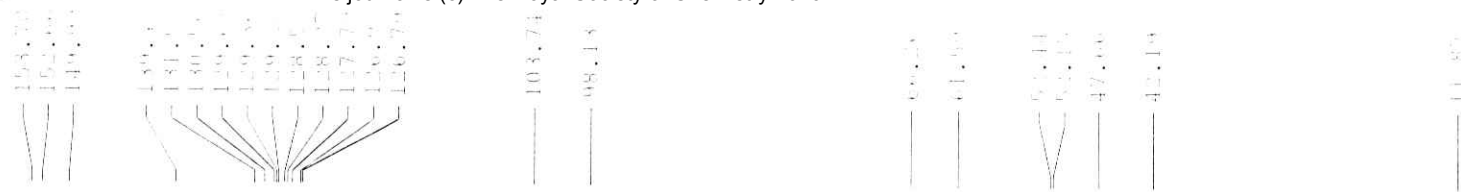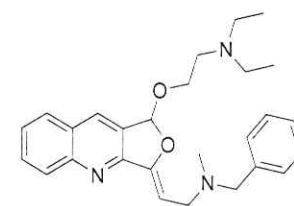

$\text{C}_{27}\text{H}_{33}\text{N}_3\text{O}_2$   
Mol. Wt.: 431.5698

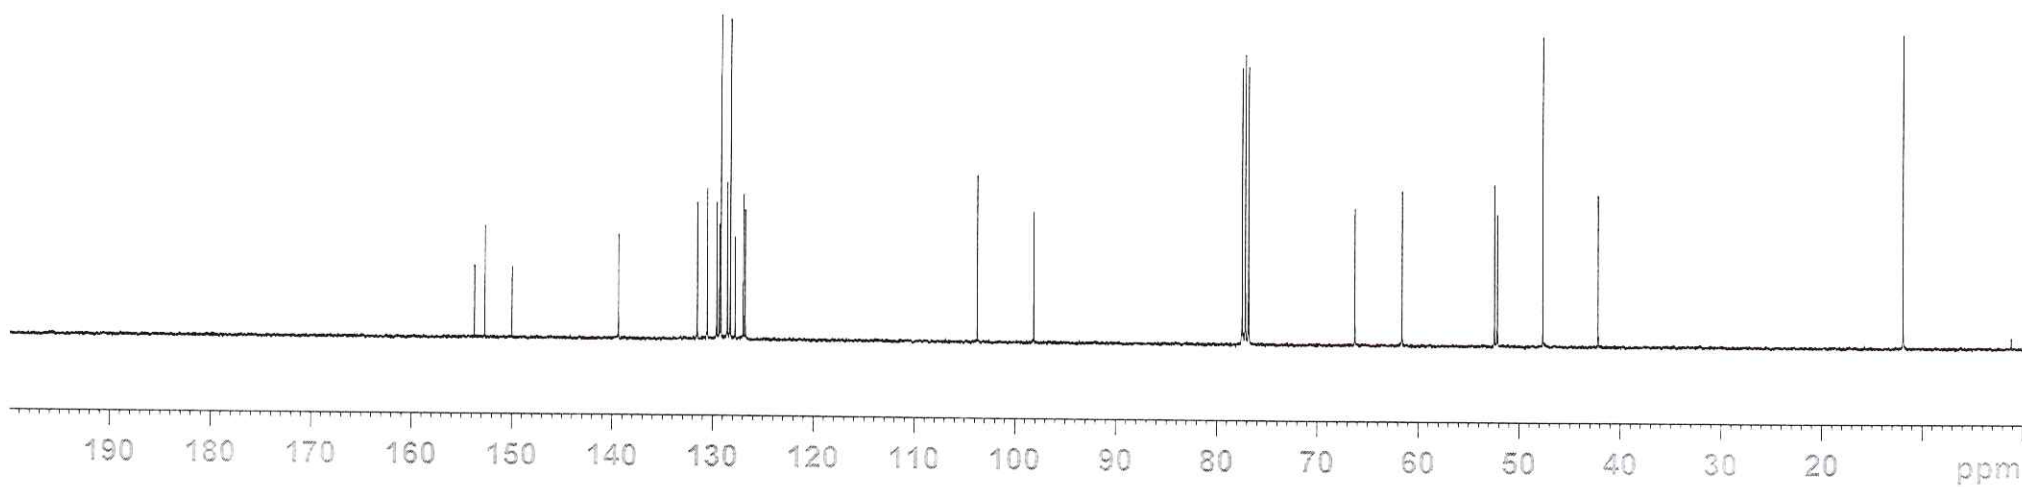

$^1\text{H}$  -  $\text{CDCl}_3$  - 300MHz

Supplementary Material (ESI) for Chemical Communications  
This journal is (c) The Royal Society of Chemistry 2010

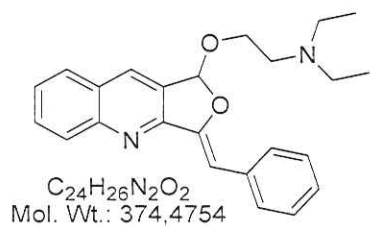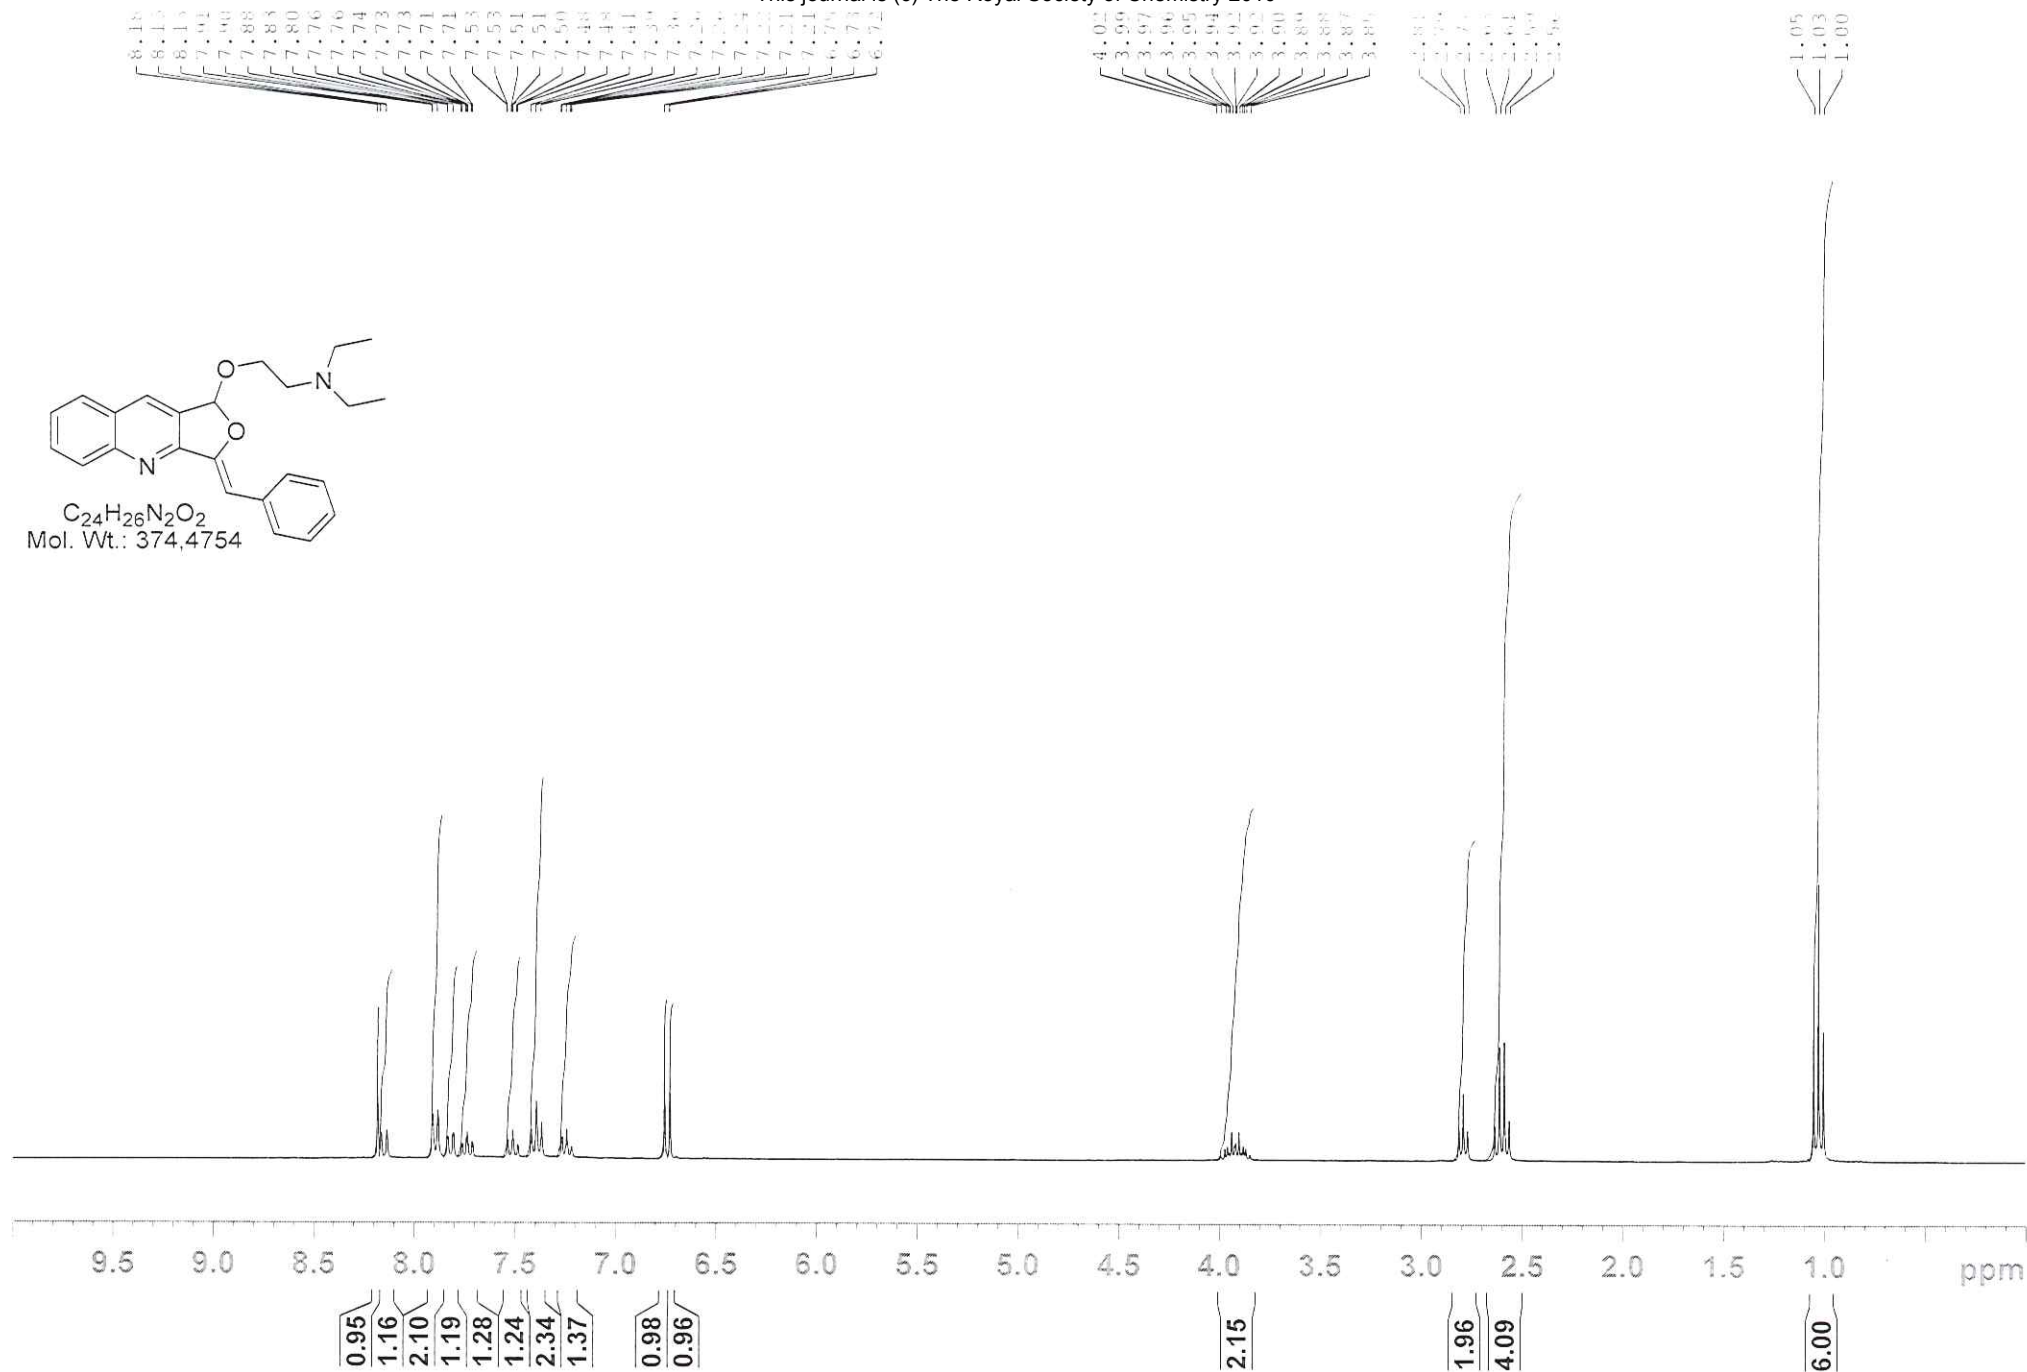



$^{13}\text{C}$  NMR -  $\text{CO}(\text{CD}_3)_2$  - 125MHz

Supplementary Material (ESI) for Chemical Communications  
This journal is (c) The Royal Society of Chemistry 2010

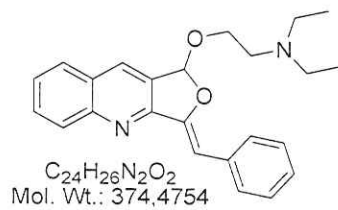

155.11  
151.88  
150.73  
136.31  
132.59  
131.44  
130.04  
129.99  
129.86  
129.68  
129.28  
128.71  
127.60  
127.45

106.18  
100.90

68.03

53.18

48.27

29.84

12.19

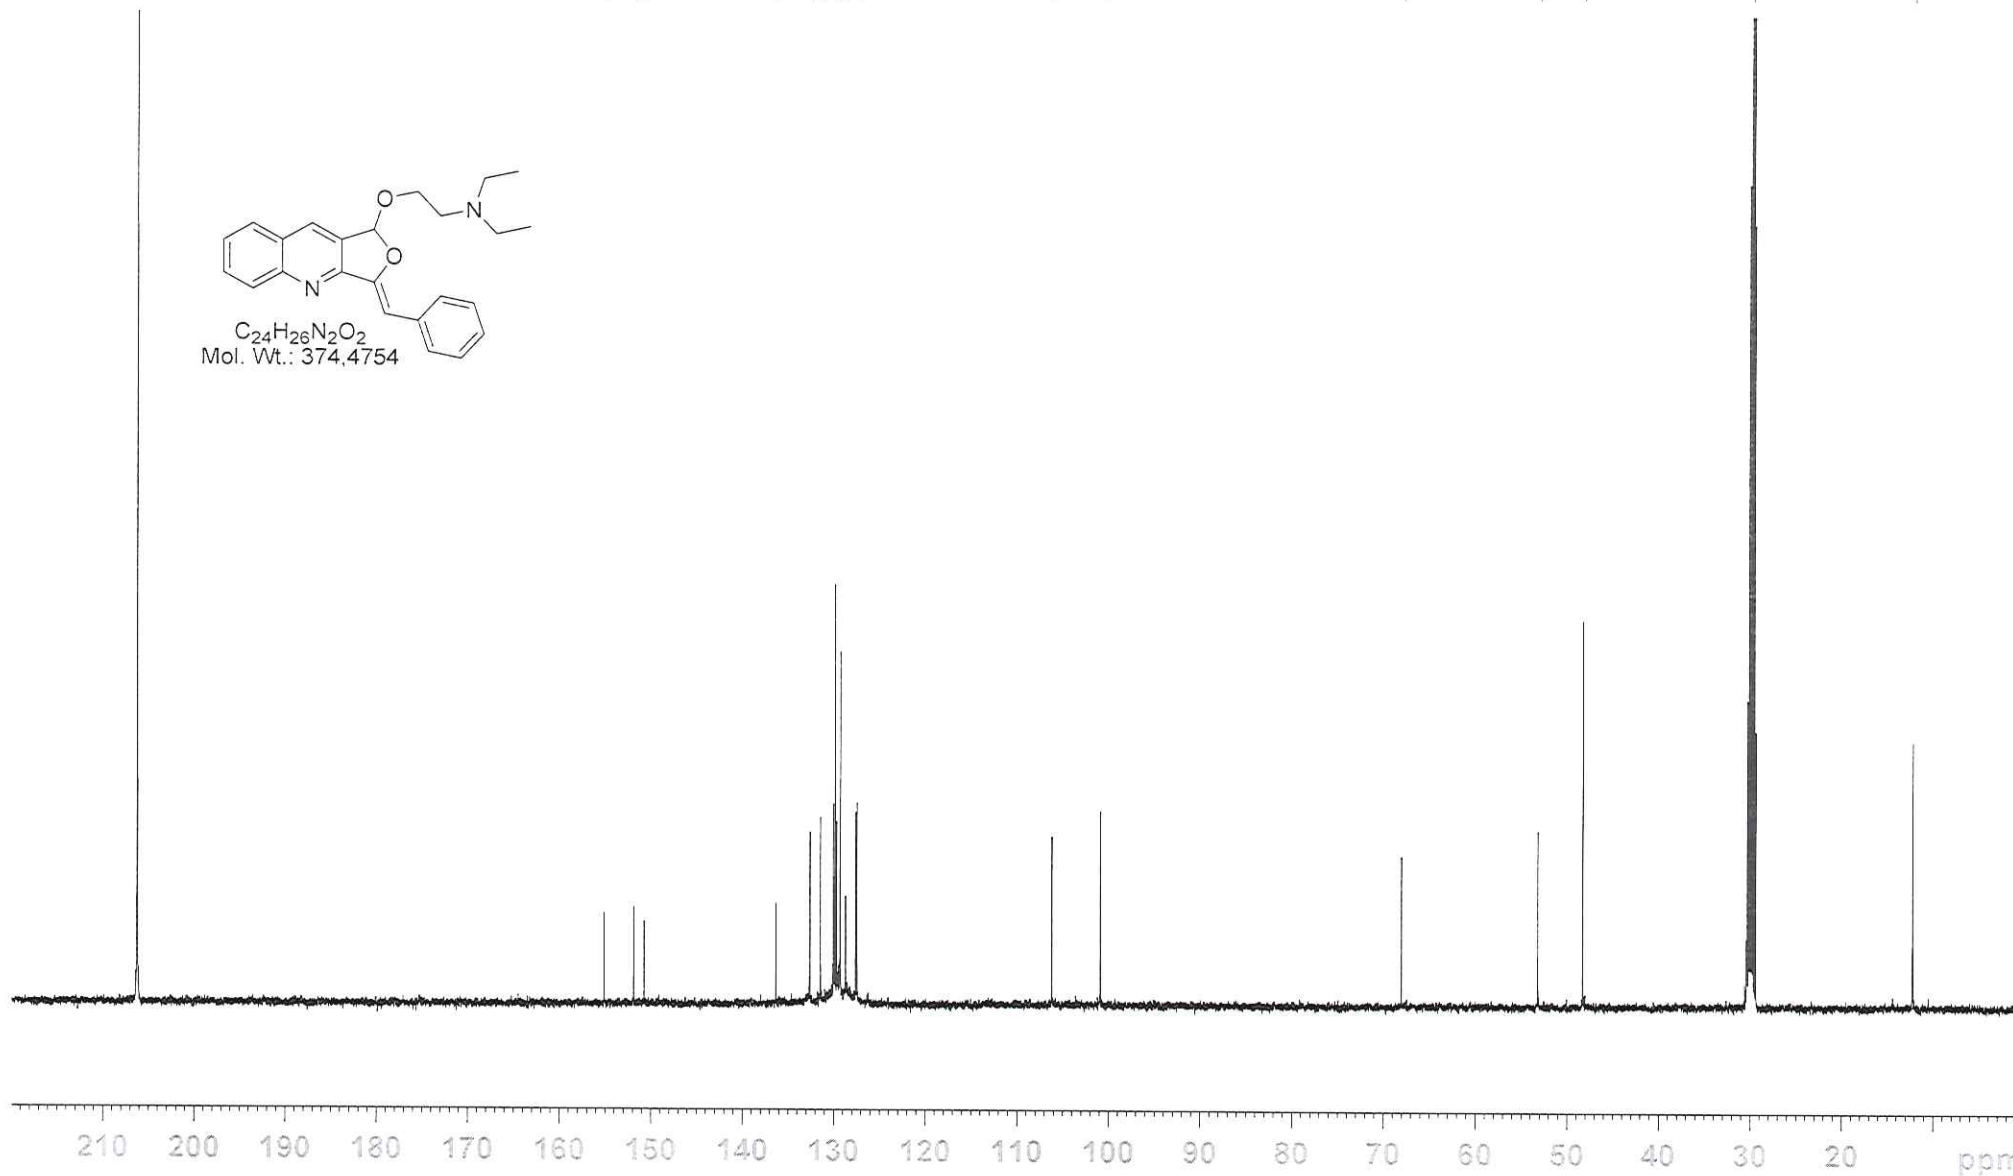

$^1\text{H}$  -  $\text{CDCl}_3$  - 300MHz

Supplementary Material (ESI) for Chemical Communications  
This journal is (c) The Royal Society of Chemistry 2010

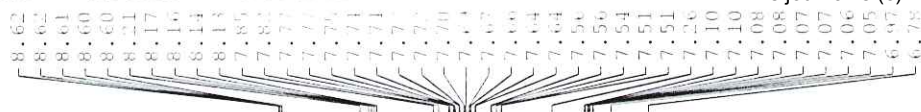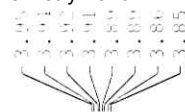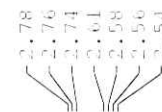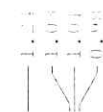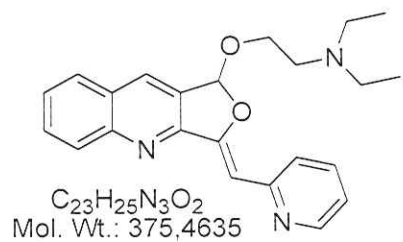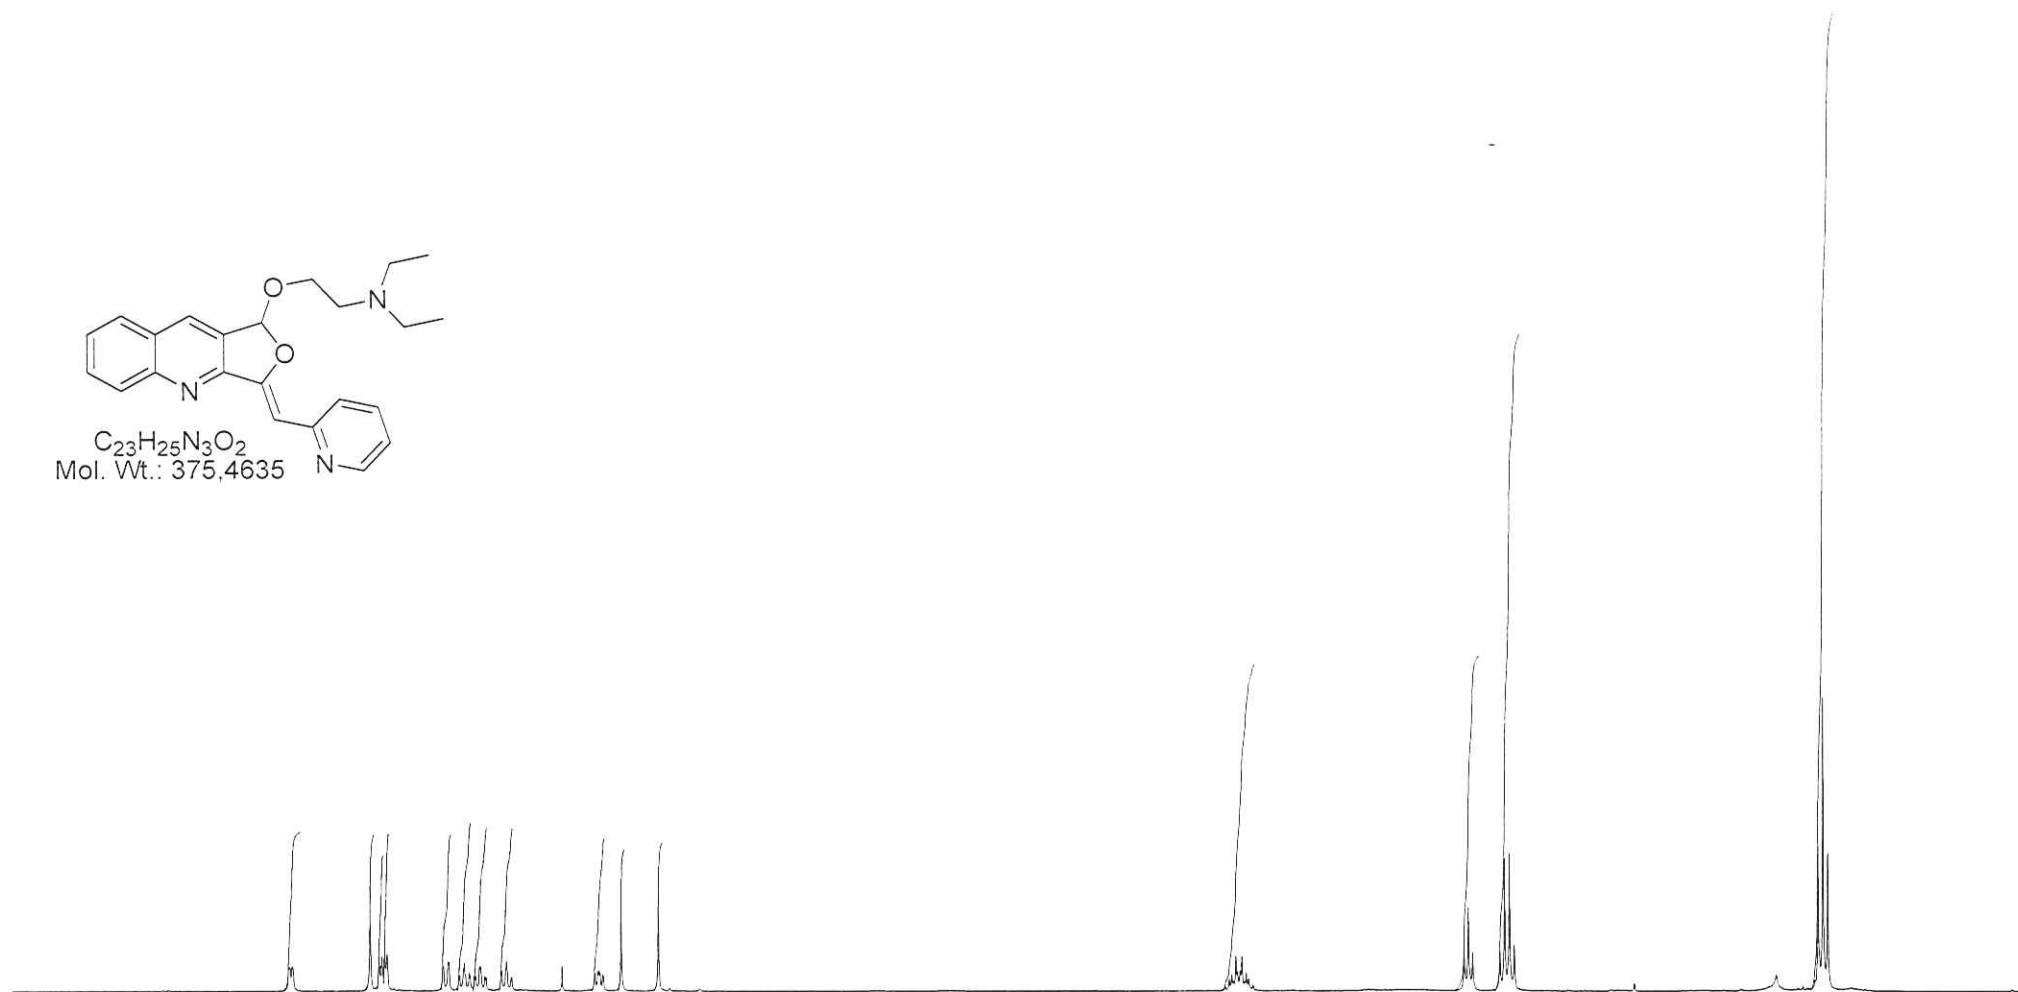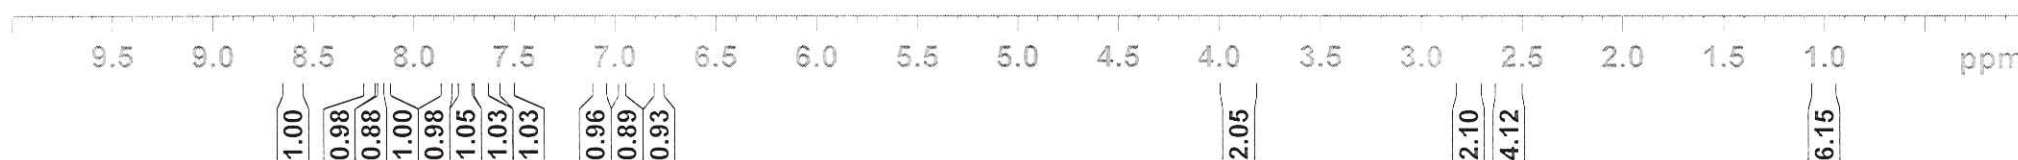

$^{13}\text{C}$  NMR -  $\text{CDCl}_3$  - 75MHz

Supplementary Material (ESI) for Chemical Communications  
This journal is (c) The Royal Society of Chemistry 2010

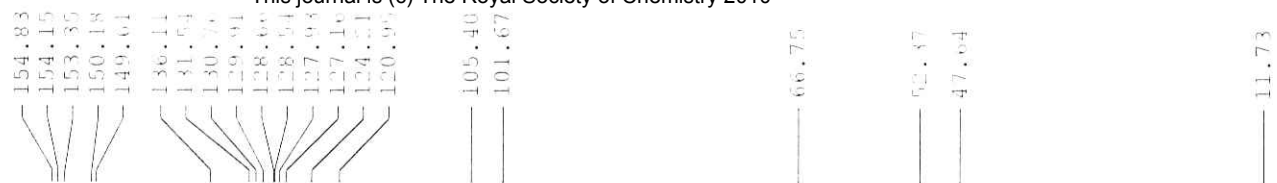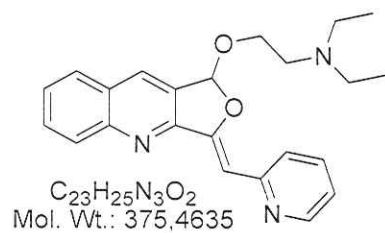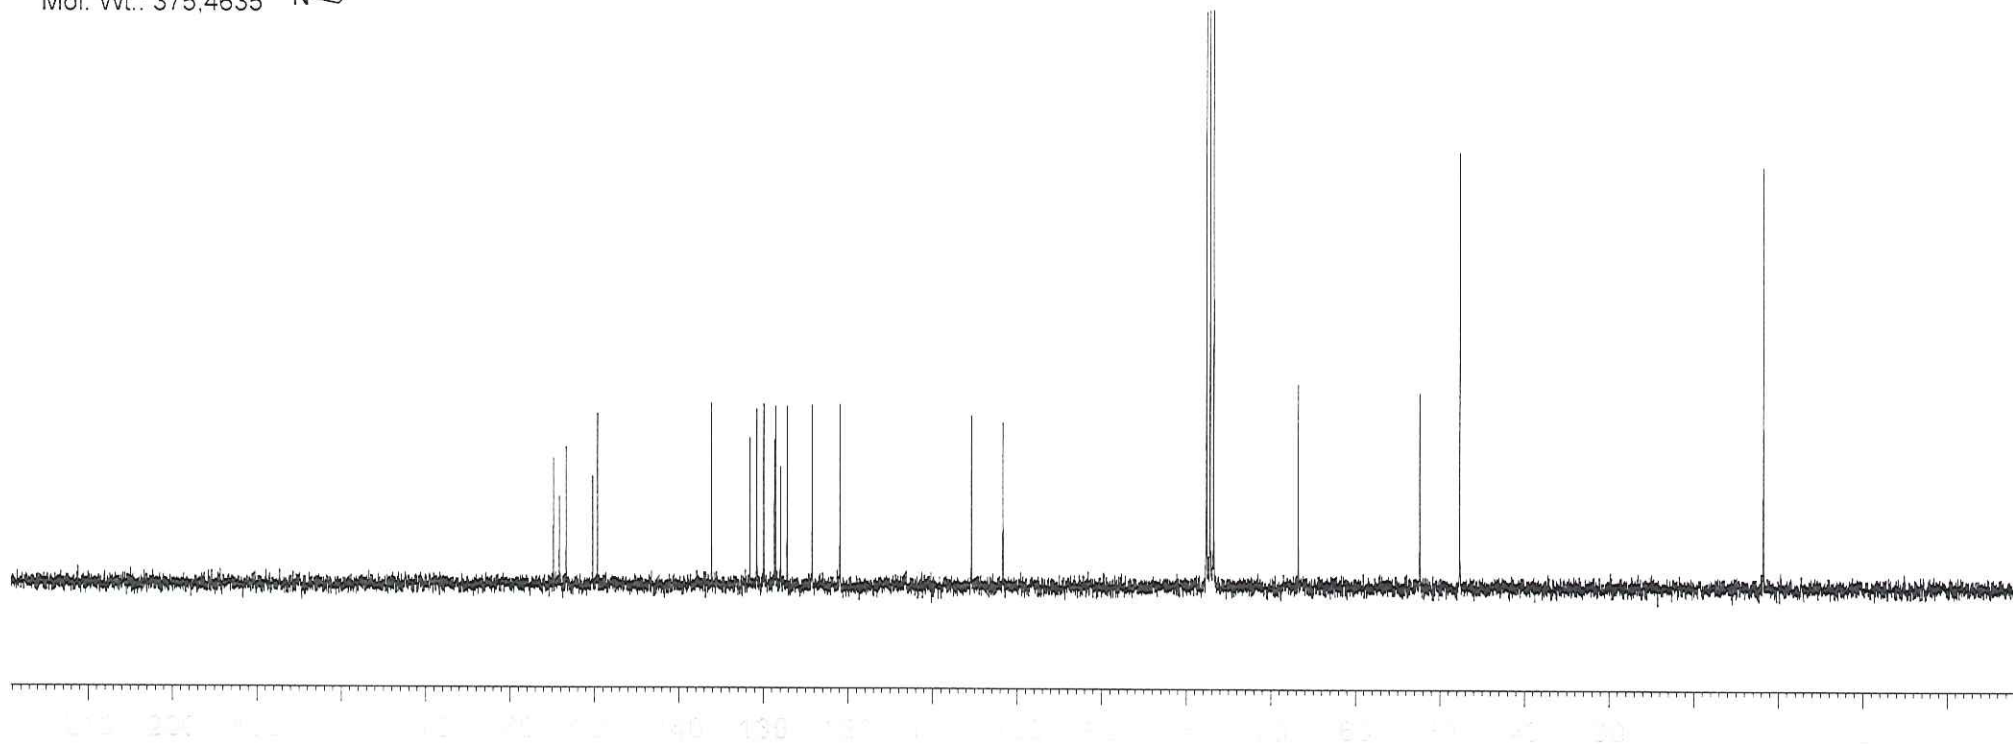

<sup>1</sup>H - CDCl<sub>3</sub> - 300MHz

Supplementary Material (ESI) for Chemical Communications  
This journal is (c) The Royal Society of Chemistry 2010

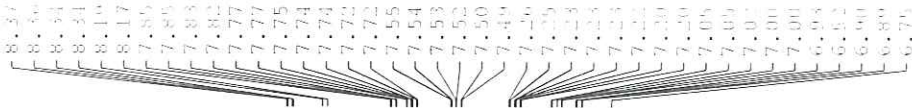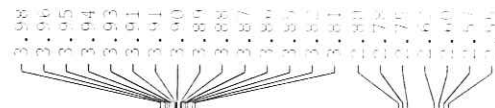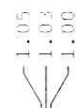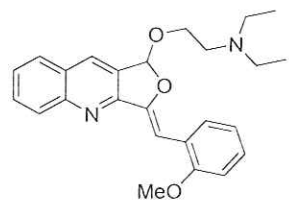

C<sub>25</sub>H<sub>28</sub>N<sub>2</sub>O<sub>3</sub>  
Mol. Wt.: 404.5014

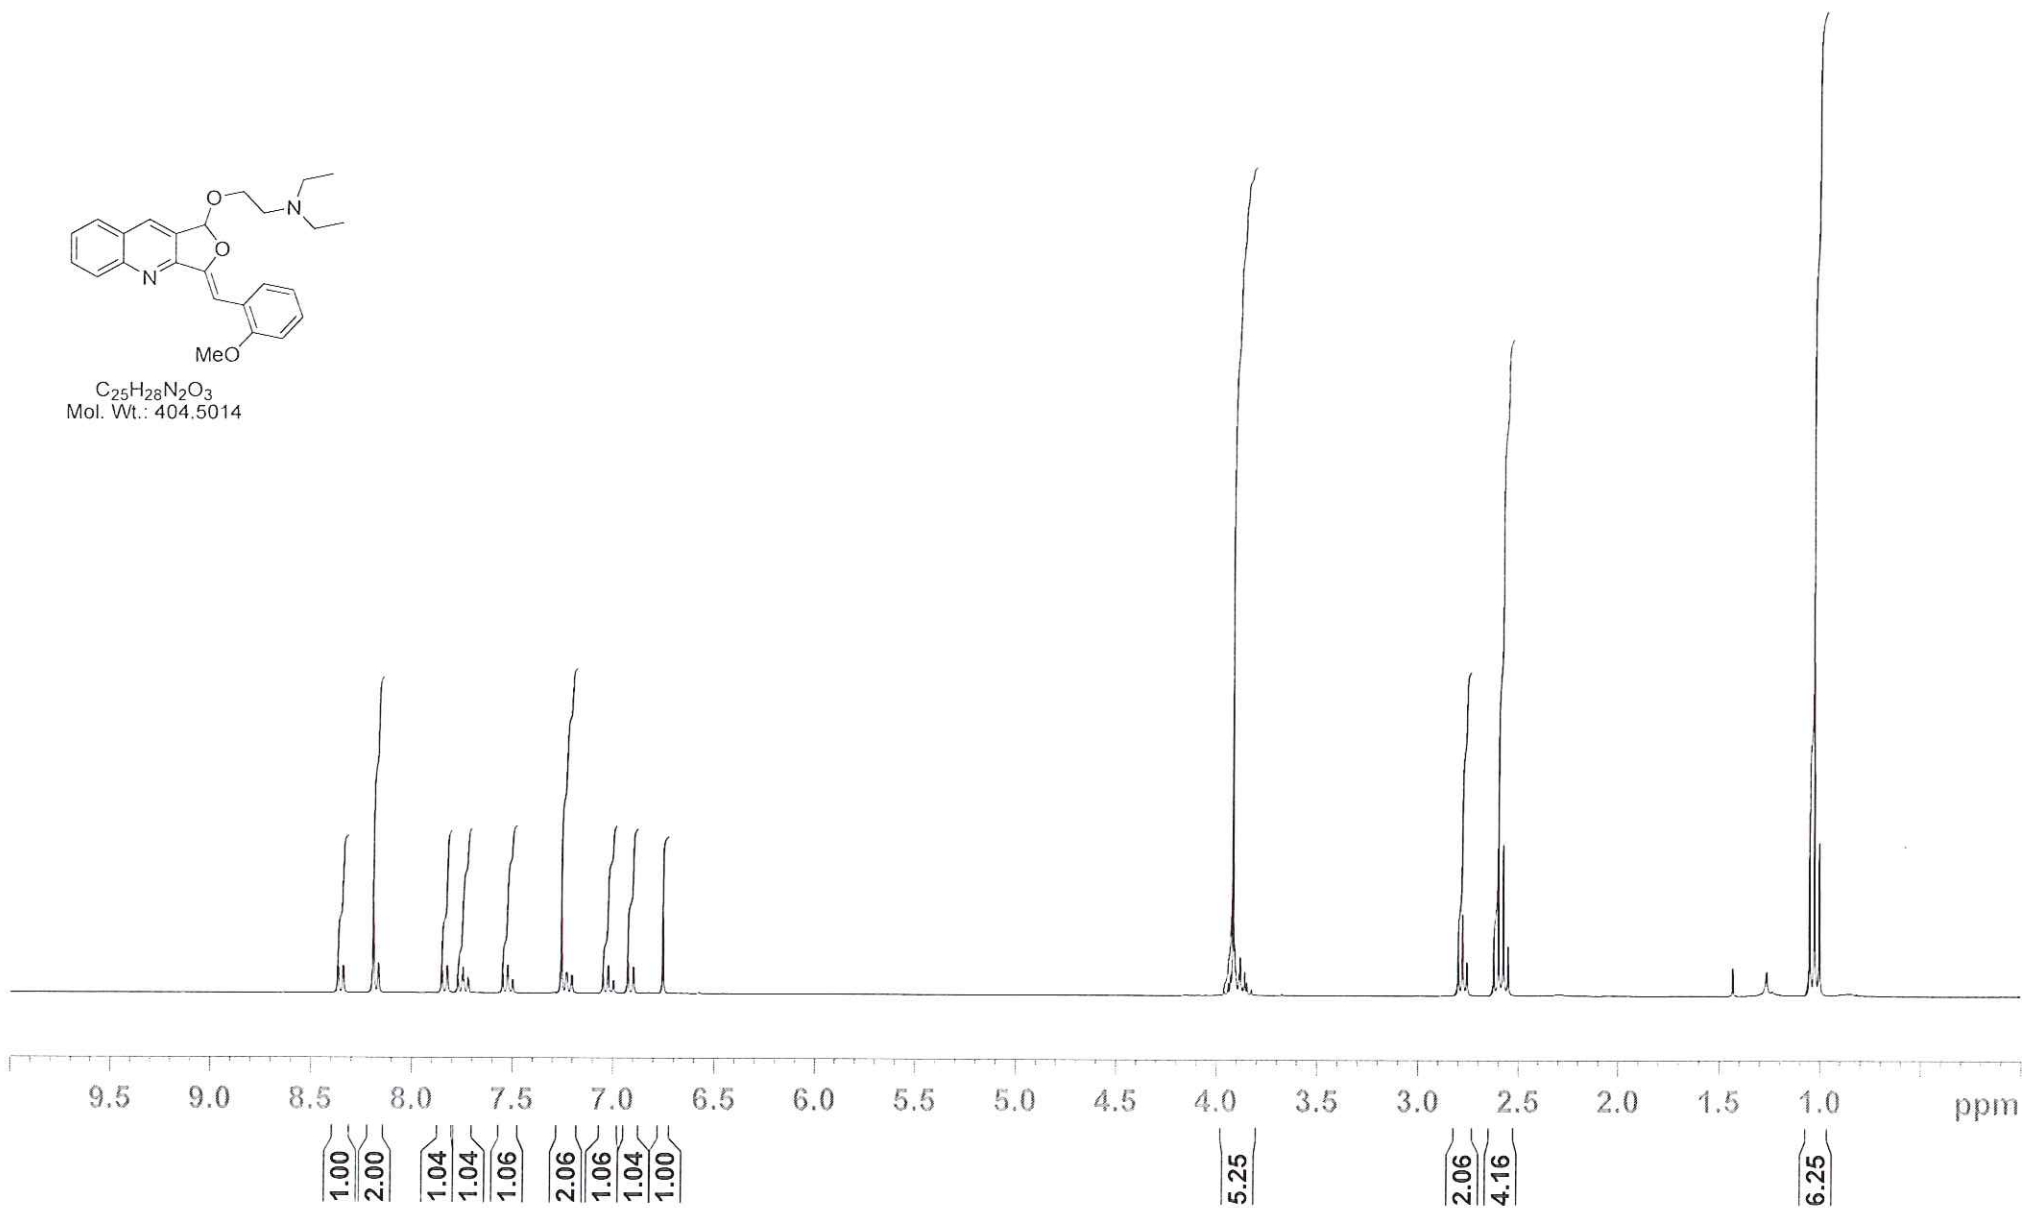

$^{13}\text{C}$  NMR -  $\text{CDCl}_3$  - 75MHz

Supplementary Material (ESI) for Chemical Communications  
This journal is (c) The Royal Society of Chemistry 2010

156.95  
154.90  
150.62  
150.11

131.49  
130.55  
130.01  
129.83  
128.67  
128.57  
128.05  
127.68  
126.64  
124.20  
120.62

110.43  
104.65

94.79

77.58  
77.16  
76.74

66.08

55.59  
52.20

47.53

11.42

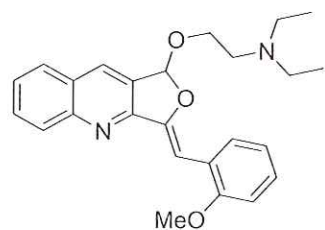

$\text{C}_{25}\text{H}_{28}\text{N}_2\text{O}_3$   
Mol. Wt.: 404,5014

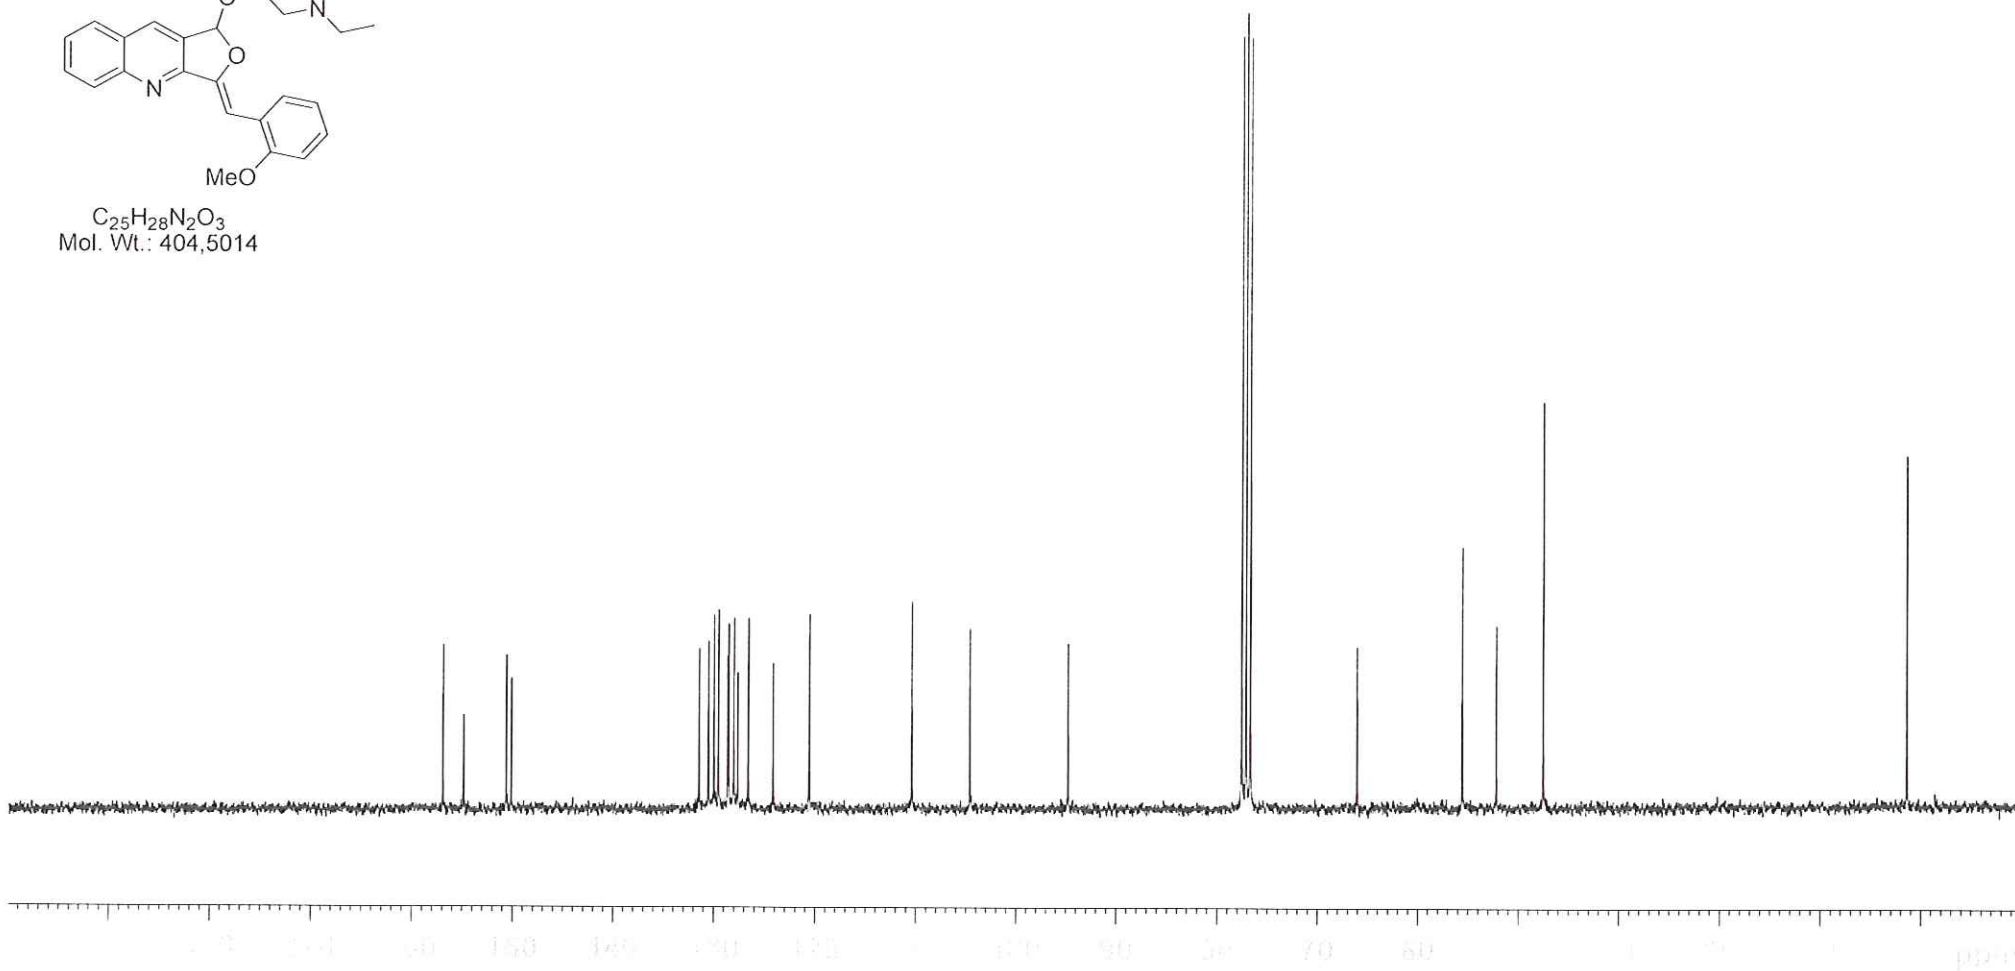

Supplement: c0cc02623a.pdf [file c0cc02623a.pdf]
